# Supplementary material for: Precision cancer sono-immunotherapy using deep-tissue activatable semiconducting polymer immunomodulatory nanoparticles
Source: Springer Nature journal article supplement (doi:10.1038/s41467-022-31551-6), 2022-07-12
Supplement: 41467_2022_31551_MOESM1_ESM.pdf [file 41467_2022_31551_MOESM1_ESM.pdf]

Supplementary Information For

**Precision Cancer Sono-immunotherapy Using Deep-tissue Activatable  
Semiconducting Polymer immunomodulatory nanoparticles**

Jingchao Li<sup>1</sup>, Yu Luo<sup>2</sup>, Ziling Zeng<sup>1</sup>, Dong Cui<sup>1</sup>, Jiaguo Huang<sup>1</sup>, Chenjie Xu<sup>1</sup>, Liping Li<sup>3</sup>, Kanyi Pu<sup>1,\*</sup>,  
and Ruiping Zhang<sup>3,\*</sup>

<sup>1</sup> School of Chemical and Biomedical Engineering, Nanyang Technological University, 70 Nanyang Drive, Singapore 637457, Singapore.

<sup>2</sup> School of Chemical Science and Engineering, Tongji University, 1239 Siping Road, Shanghai, 200092, China.

<sup>3</sup> The Third Hospital of Shanxi Medical University, Shanxi Bethune Hospital, Shanxi Academy of Medical Sciences, Taiyuan, 030032, China.

\*E-mail: kypu@ntu.edu.sg; zrp\_7142@sxmu.edu.cn

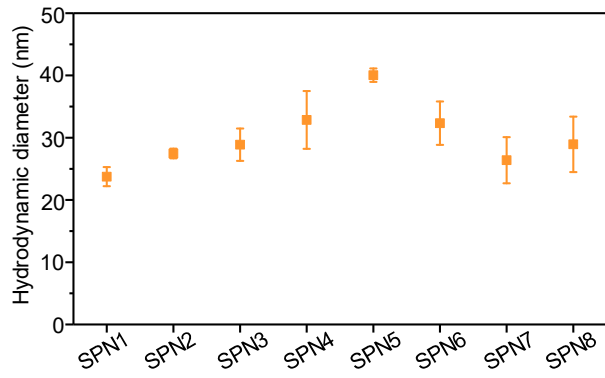

**Supplementary Figure 1. Hydrodynamic diameters of SPNs.** Hydrodynamic diameters of SPNs (20  $\mu\text{g/mL}$ ) in 1 $\times$  PBS (pH = 7.4) measured by DLS (n = 3). Data are presented as mean values  $\pm$  SD. Source data are provided as a Source Data file.

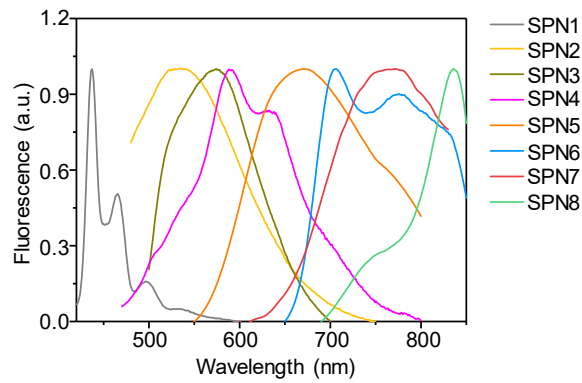

**Supplementary Figure 2. Optical characterization of SPNs.** Fluorescence spectra of SPNs in 1 $\times$  PBS (pH = 7.4). Source data are provided as a Source Data file.

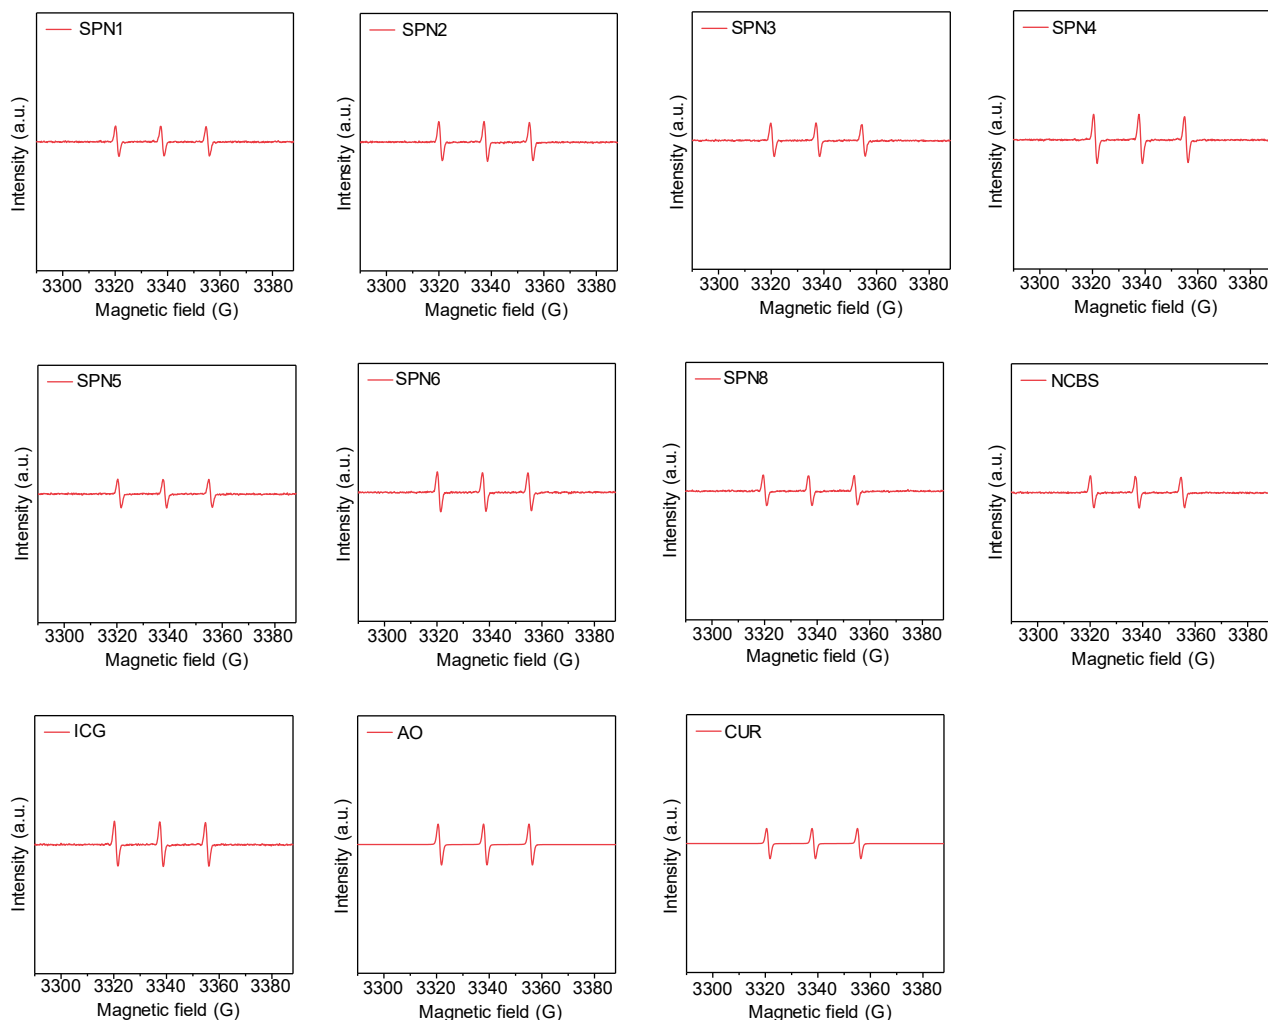

**Supplementary Figure 3. Study of sonodynamic  $^1\text{O}_2$  generation.** ESR spectra of SPN1, SPN2, SPN3, SPN4, SPN5, SPN6, SPN8, NCBS, ICG, AO and CUR at the concentration of 20  $\mu\text{g}/\text{mL}$  after US irradiation (1.0 MHz, 1.2  $\text{W}/\text{cm}^2$ , 50% duty cycle, 5 min) using TEMP as the trap. Source data are provided as a Source Data file.

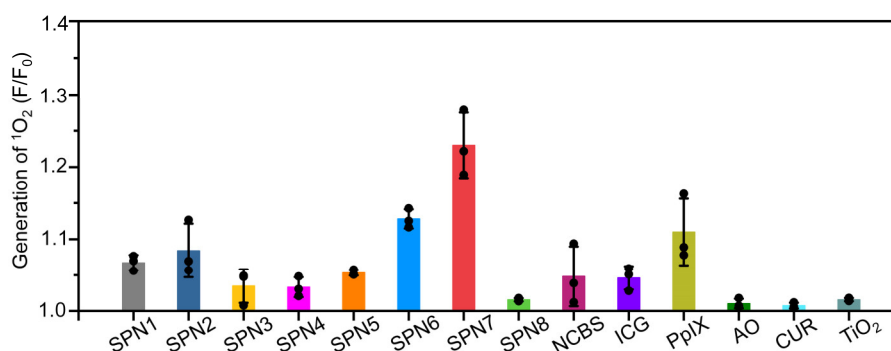

**Supplementary Figure 4. Study of photodynamic  $^1\text{O}_2$  generation.** Fluorescence enhancement ( $F/F_0$ ) of SOSG (1  $\mu\text{M}$ ) at 528 nm in solutions containing SPN1-8, NCBS, ICG, PpIX, AO, CUR or TiO<sub>2</sub> nanoparticles at the concentration of 20  $\mu\text{g}/\text{mL}$  after white light irradiation (0.1  $\text{W}/\text{cm}^2$ , 1 min) ( $n = 3$ ). Data are presented as mean values  $\pm$  SD. Source data are provided as a Source Data file.

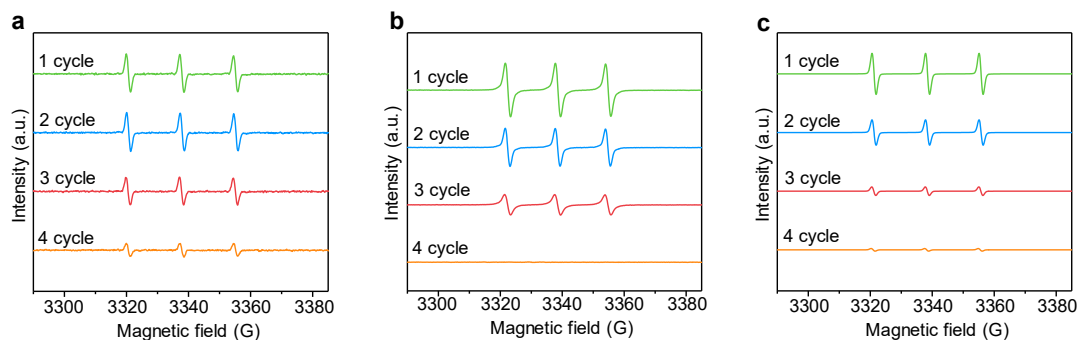

**Supplementary Figure 5. Sonodynamic stability study.** ESR spectra of ICG (a), PpIX (b) and AO (c) at the concentration of 20 µg/mL after 1, 2, 3, and 4 cycles of US irradiation (1.0 MHz, 1.2 W/cm<sup>2</sup>, 50% duty cycle, 5 min for each cycle) with TEMP as the trap. Source data are provided as a Source Data file.

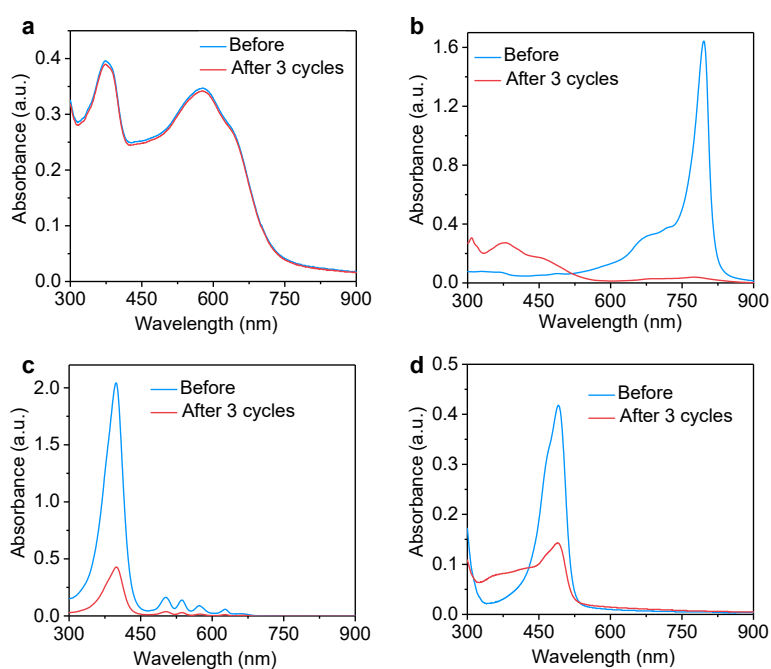

**Supplementary Figure 6. Sonodynamic stability study.** UV-vis absorption spectra of SPN7 (a), ICG (b), PpIX (c) and AO (d) at the concentration of 20 µg/mL after US irradiation (1.0 MHz, 1.2 W/cm<sup>2</sup>, 50% duty cycle, 5 min for each cycle). Source data are provided as a Source Data file.

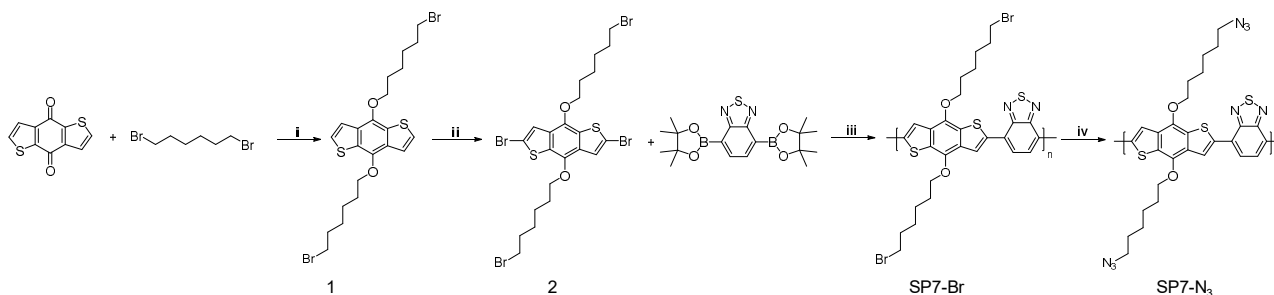

**Supplementary Figure 7. Synthesis of SP7-N<sub>3</sub>.** Reagents and conditions: i) Zn, NaOH, TBAB, H<sub>2</sub>O, 100 °C, 18 h; ii) Br<sub>2</sub>, DCM, room temperature, 6 h; iii) Pd(PPh<sub>3</sub>)<sub>4</sub>, K<sub>2</sub>CO<sub>3</sub>, methyltrioctylammonium



chloride, 100 °C, 24 h; iv) NaN<sub>3</sub>, THF/DMF, room temperature, 12 h.

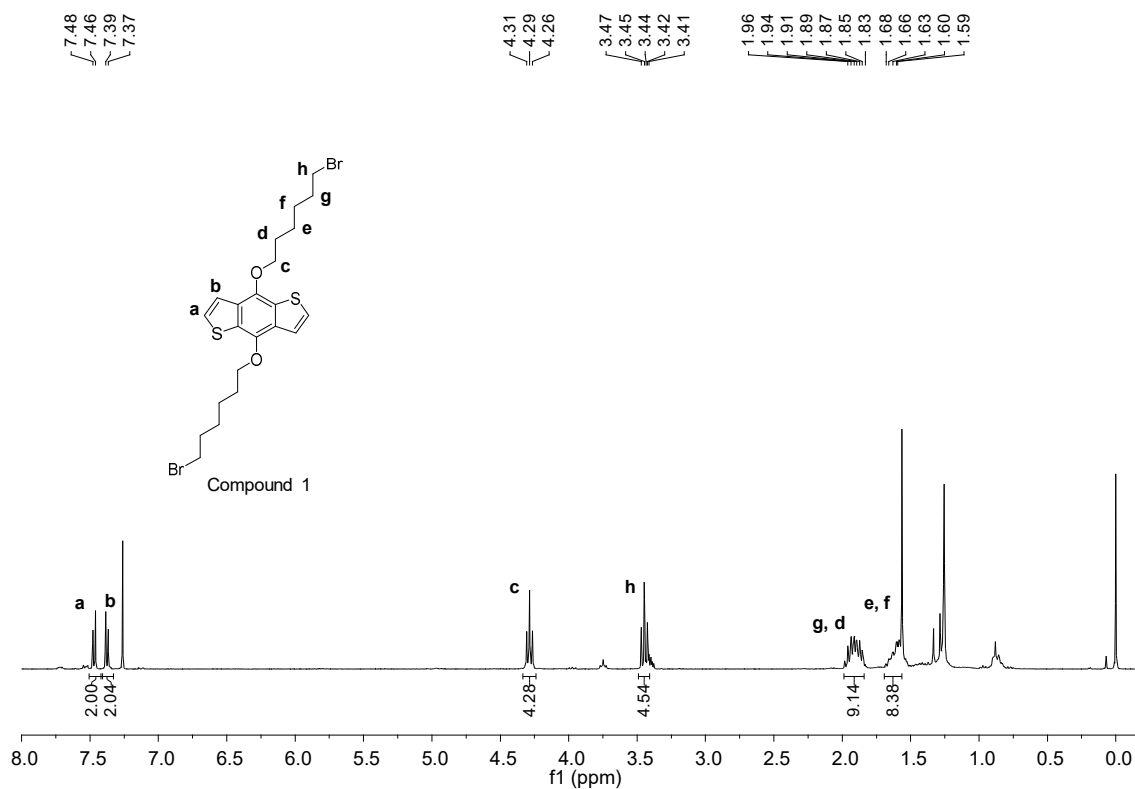

Supplementary Figure 8. <sup>1</sup>H NMR characterization. <sup>1</sup>H NMR spectrum of compound 1 in CDCl<sub>3</sub>.

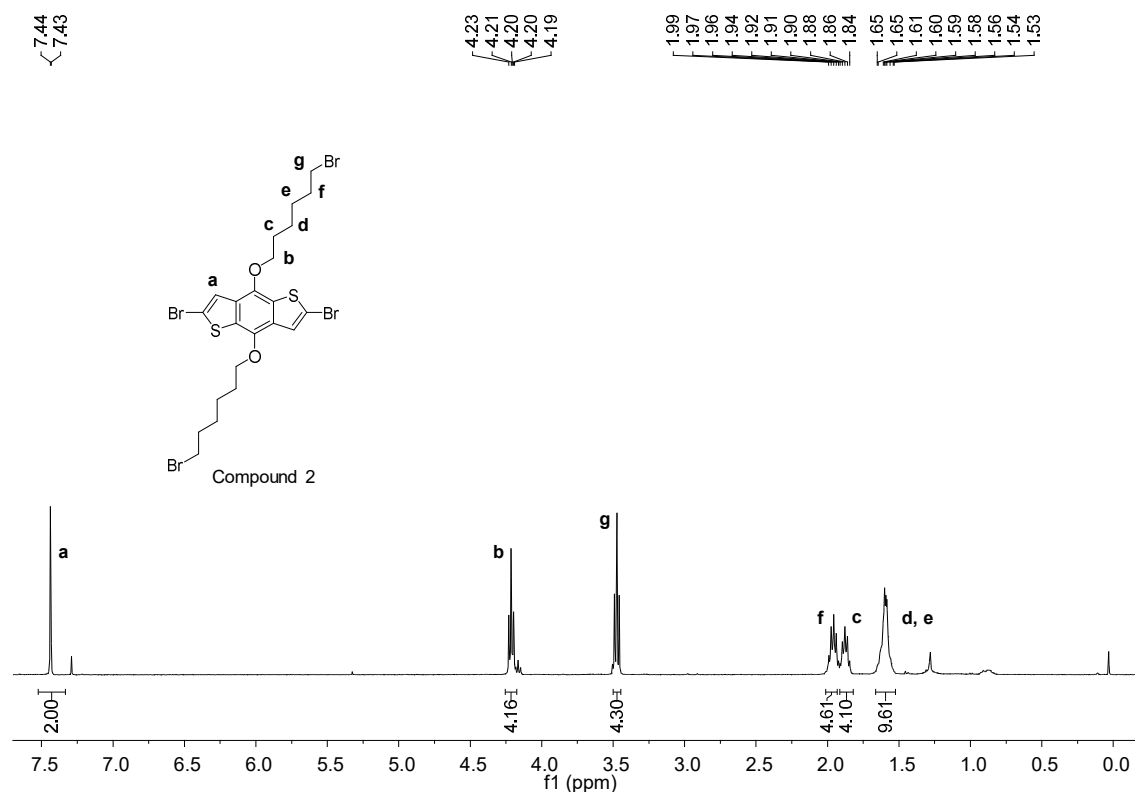

Supplementary Figure 9. <sup>1</sup>H NMR characterization. <sup>1</sup>H NMR spectrum of compound 2 in CDCl<sub>3</sub>.

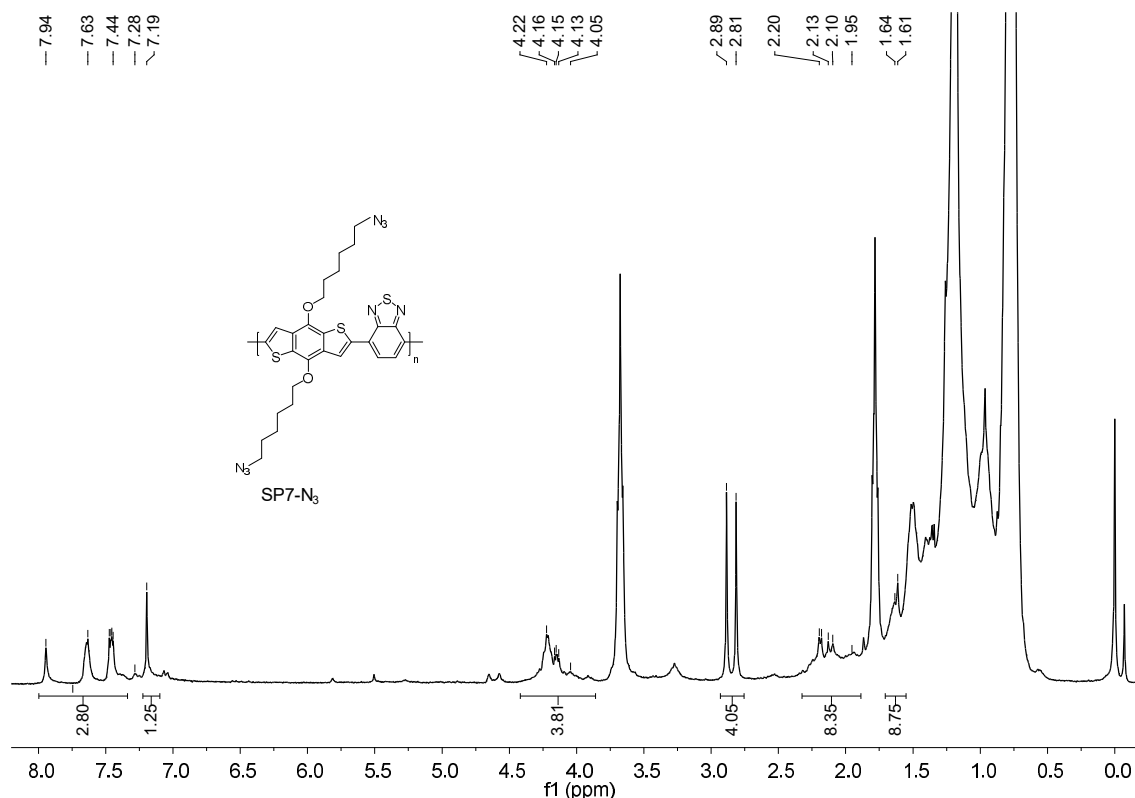

**Supplementary Figure 10.  $^1\text{H}$  NMR characterization.**  $^1\text{H}$  NMR spectrum of SP7- $\text{N}_3$  in  $\text{CDCl}_3$ .

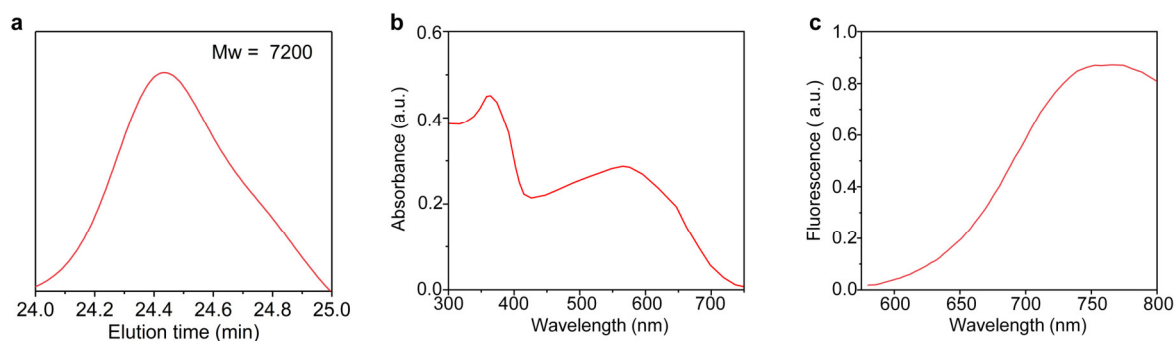

**Supplementary Figure 11. Characterization of SP7- $\text{N}_3$ .** Gel permeation chromatography (GPC) curve (a), UV-vis absorption spectrum (b), and fluorescence spectrum (c) of SP7- $\text{N}_3$  in THF. Source data are provided as a Source Data file.

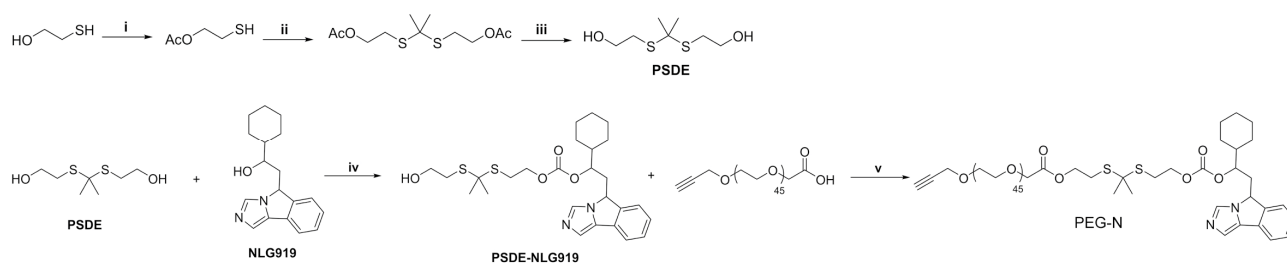

**Supplementary Figure 12. Synthesis of PEG-N.** Reagents and conditions: i)  $\text{Ac}_2\text{O}$ ,  $\text{TiCl}_3(\text{OTf})$ , room temperature, 3 h. ii) Acetone, TFA, room temperature, 24 h. iii) KOH, MeOH, room temperature, 16 h. (iv) BTC, TEA, DMAP, DCM, room temperature, 10 h; v) EDCI, DMAP, DCM, room temperature, 12 h.

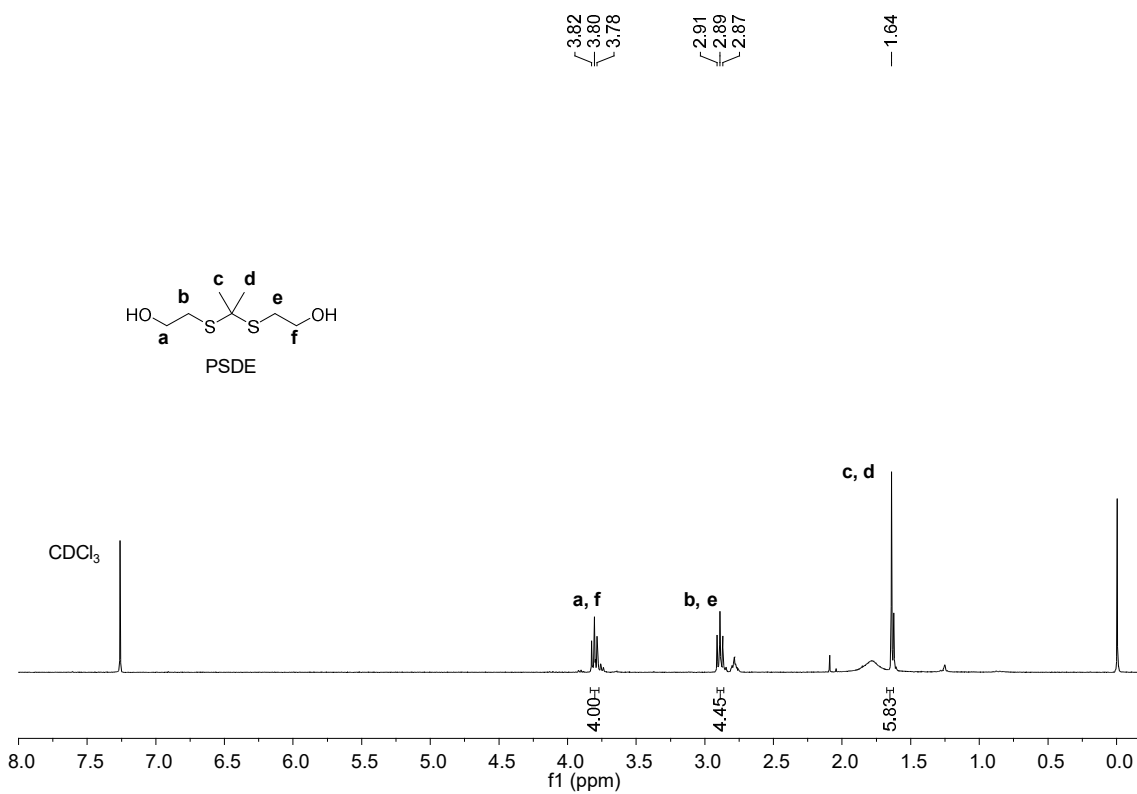

Supplementary Figure 13. <sup>1</sup>H NMR characterization. <sup>1</sup>H NMR spectrum of PSDE in CDCl<sub>3</sub>.

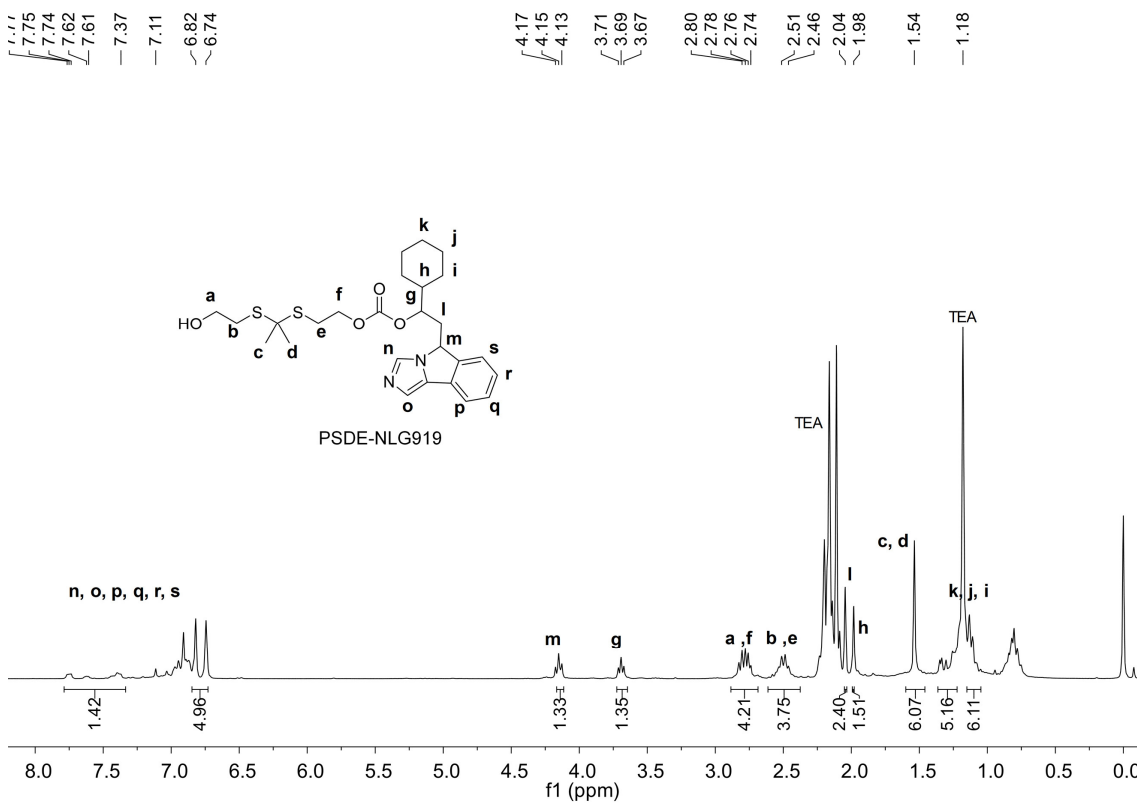

Supplementary Figure 14. <sup>1</sup>H NMR characterization. <sup>1</sup>H NMR spectrum of PSDE-NLG919 in CDCl<sub>3</sub>.

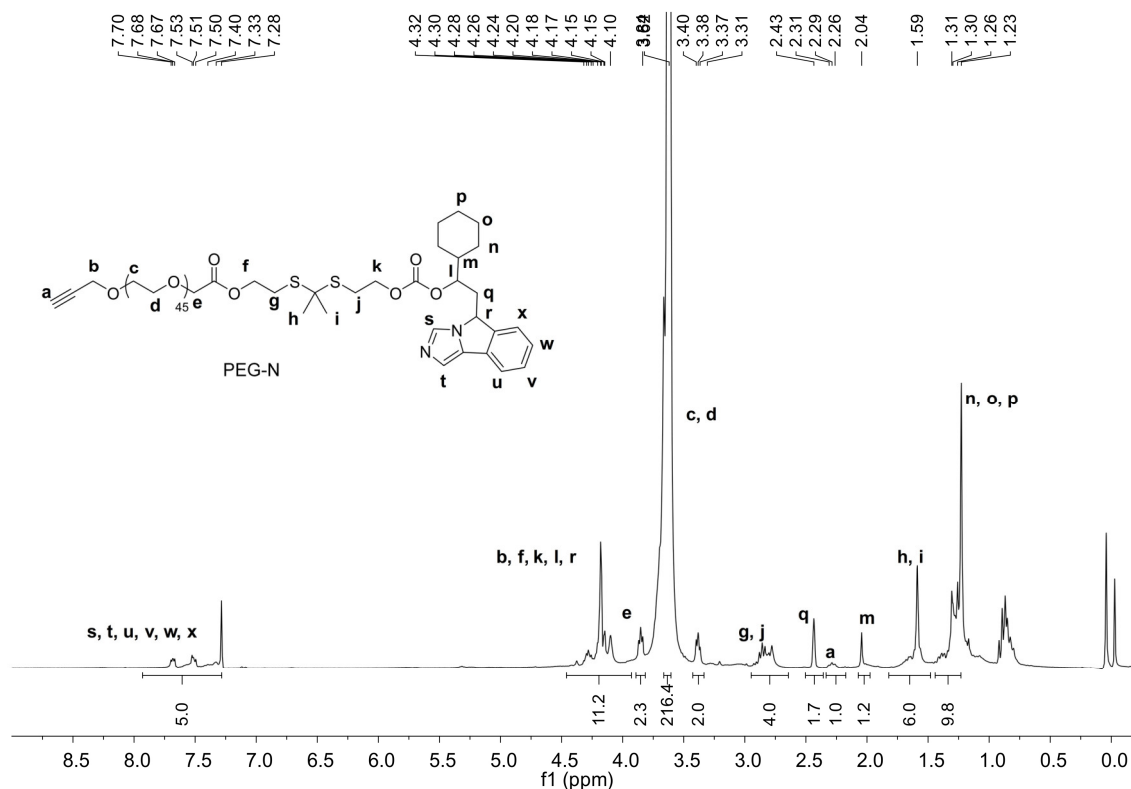

**Supplementary Figure 15.  $^1\text{H}$  NMR characterization.**  $^1\text{H}$  NMR spectrum of PEG-N in  $\text{CDCl}_3$ .

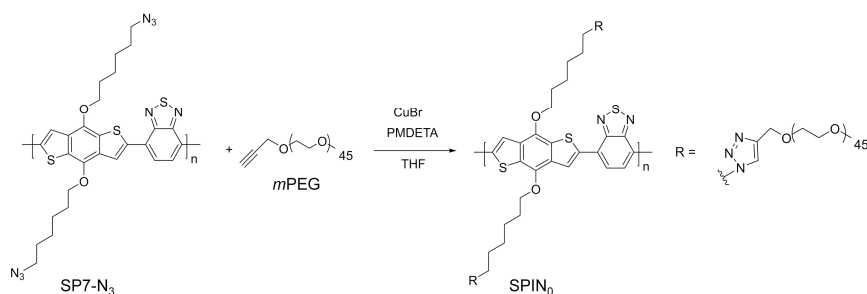

**Supplementary Figure 16. Synthesis of  $\text{SPIN}_0$ .** Reagents and conditions: copper(I)bromide ( $\text{CuBr}$ ),  $N,N,N',N'',N''$ -pentamethyldiethylenetriamin (PMDETA), THF, room temperature, 24 h.

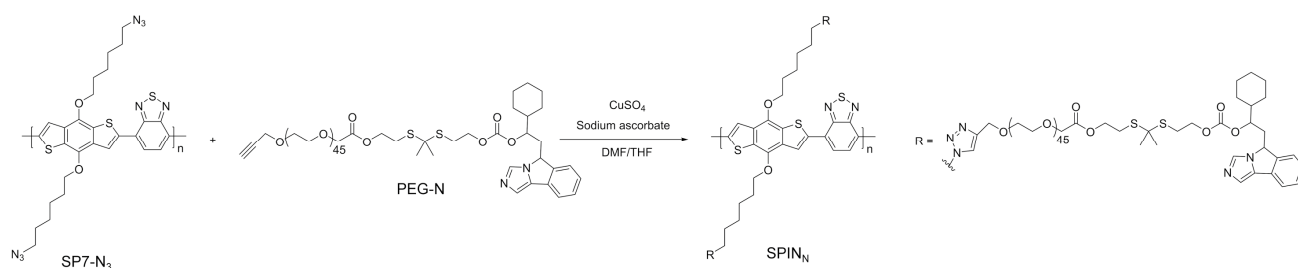

**Supplementary Figure 17. Synthesis of  $\text{SPIN}_n$ .** Reagents and conditions:  $\text{CuSO}_4$ , sodium ascorbate, DMF/THF, room temperature, 24 h.

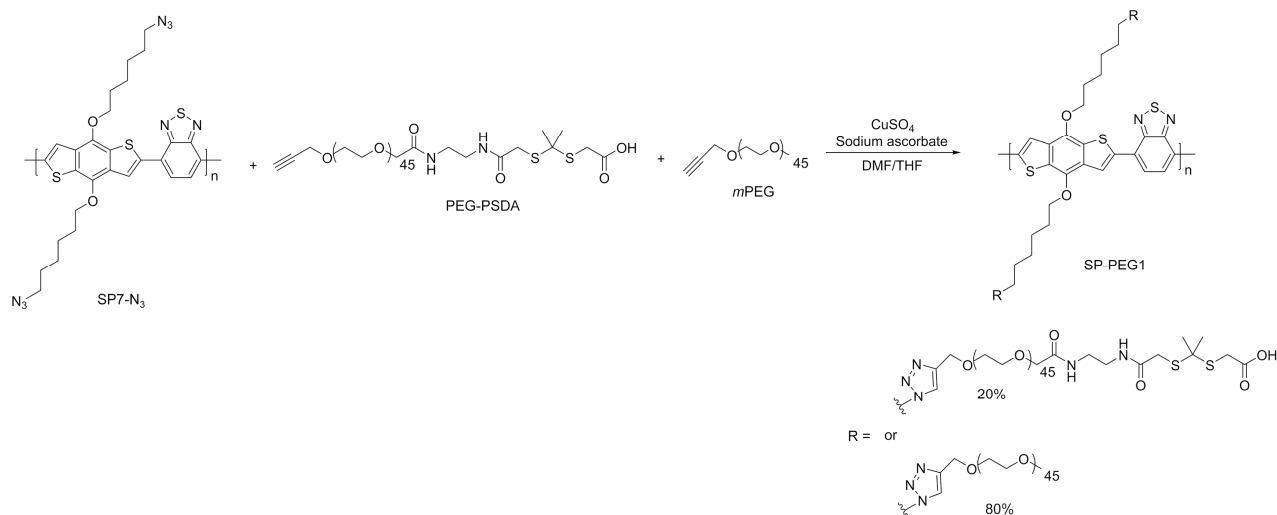

**Supplementary Figure 18. Synthesis of SPN-PEG1.** Reagents and conditions:  $\text{CuSO}_4$ , sodium ascorbate, DMF/THF, room temperature, 24 h.

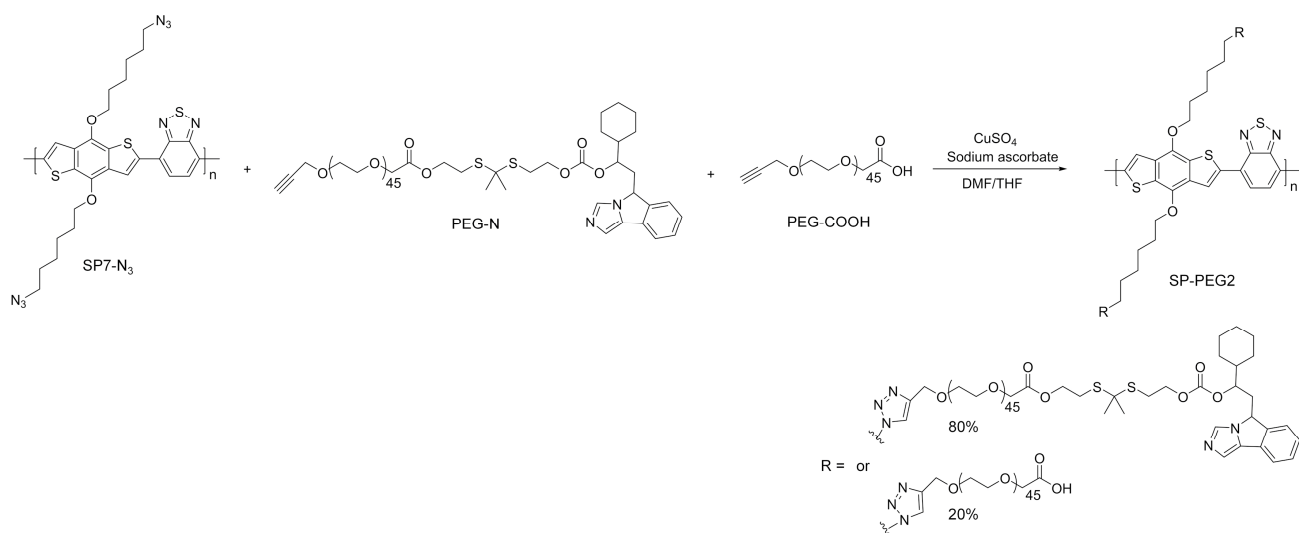

**Supplementary Figure 19. Synthesis of SPN-PEG2.** Reagents and conditions:  $\text{CuSO}_4$ , sodium ascorbate, DMF/THF, room temperature, 24 h.

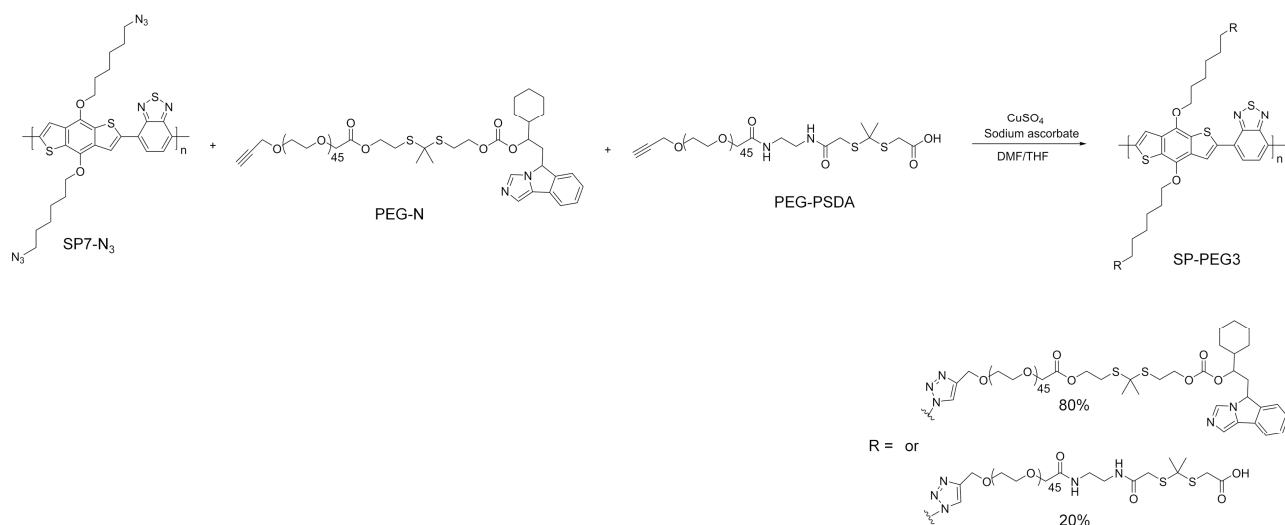

**Supplementary Figure 20. Synthesis of SPN-PEG3.** Reagents and conditions:  $\text{CuSO}_4$ , sodium ascorbate, DMF/THF, room temperature, 24 h.

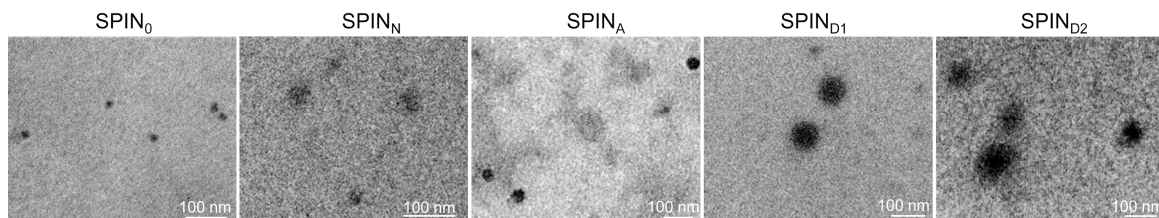

**Supplementary Figure 21. Morphology characterization of SPINs.** Representative TEM images of SPIN<sub>0</sub>, SPIN<sub>N</sub>, SPIN<sub>A</sub>, SPIN<sub>D1</sub>, and SPIN<sub>D2</sub>. The experiments were repeated independently three times with similar results.

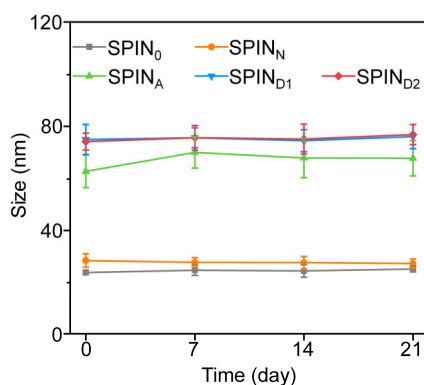

**Supplementary Figure 22. Colloidal stability study of SPINs.** Hydrodynamic sizes of SPINs after different days of storage in 1× PBS buffer (pH = 7.4) (n = 3). Data are presented as mean values ± SD. Source data are provided as a Source Data file.

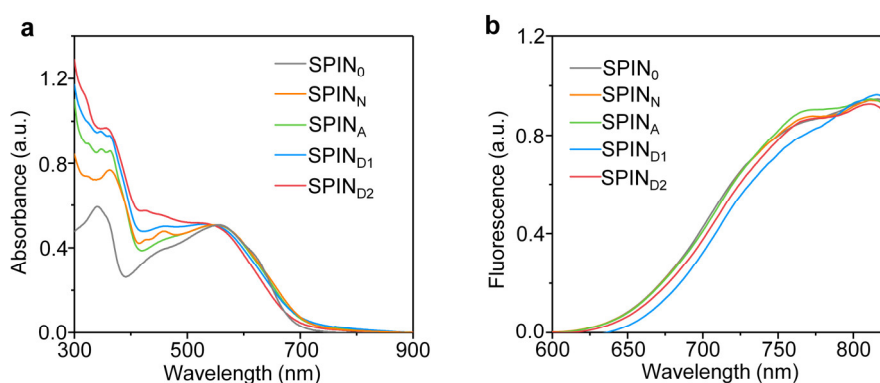

**Supplementary Figure 23. Optical property characterization of SPINs.** UV-vis absorption (a) and fluorescence (b) spectra of SPINs in 1× PBS buffer (pH = 7.4). Source data are provided as a Source Data file.

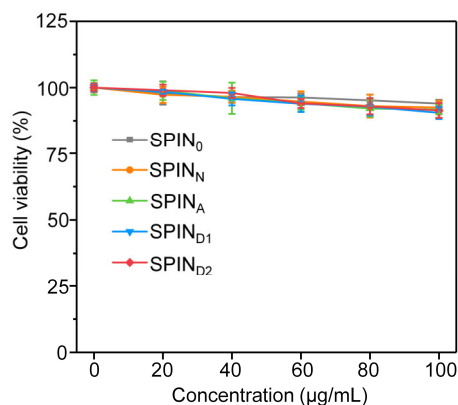

**Supplementary Figure 24. Cytotoxicity assay of SPINs.** In vitro cell viability of Panc02 cancer cells after treatment with SPINs at the final concentrations of 0, 20, 40, 60, 80 and 100 µg/mL for 24 h. The cells without treatment were used as control. The cell viability was measured using CCK-8 kit (n = 5). Data are presented as mean values ± SD. Source data are provided as a Source Data file.

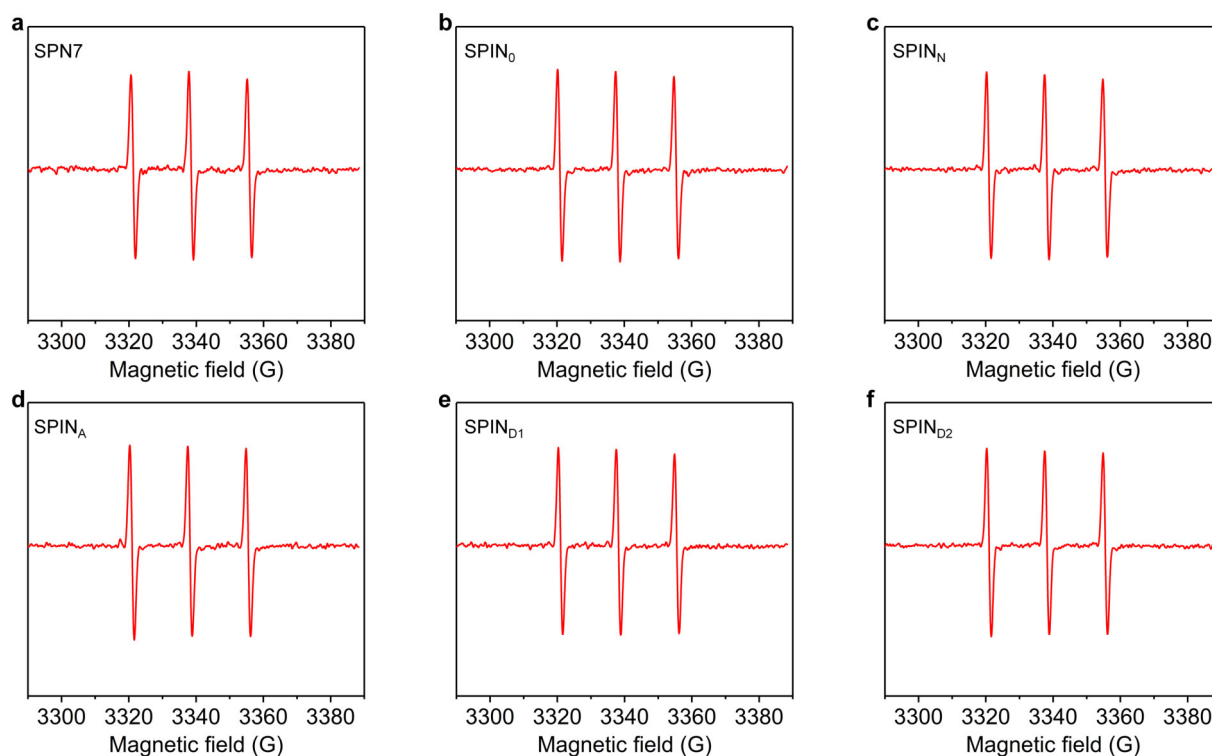

**Supplementary Figure 25. Study of sonodynamic <sup>1</sup>O<sub>2</sub> generation for SPINs.** ESR spectra of SPIN7 (a), SPIN<sub>0</sub> (b), SPIN<sub>N</sub> (c), SPIN<sub>A</sub> (d), SPIN<sub>D1</sub> (e), and SPIN<sub>D2</sub> (f) at the same concentration (10 µg/mL) after US irradiation (1.0 MHz, 1.2 W/cm<sup>2</sup>, 50% duty cycle, 3 min) using TEMP as the trap. Source data are provided as a Source Data file.

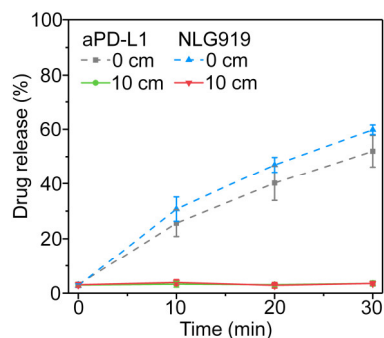

**Supplementary Figure 26. Photoirradiation-induced drug release.** Release profiles of aPD-L1 and NLG919 from SPIN<sub>D2</sub> (40 µg/mL) after white light irradiation for different time (n = 4). Data are presented as mean values ± SD. Source data are provided as a Source Data file.

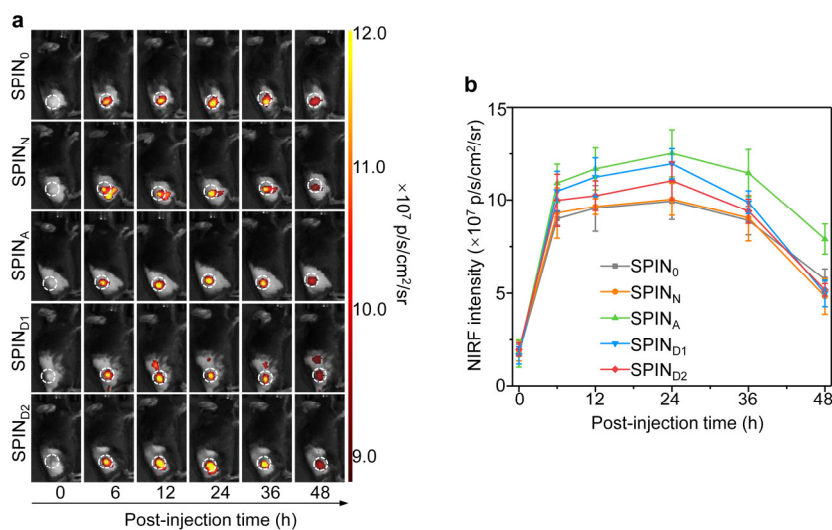

**Supplementary Figure 27. In vivo NIR fluorescence imaging of tumor-bearing mice.** (a) In vivo NIR fluorescence imaging of Panc02 tumor-bearing mice after systemic administrations of SPIN<sub>0</sub>, SPIN<sub>N</sub>, SPIN<sub>A</sub>, SPIN<sub>D1</sub>, and SPIN<sub>D2</sub> (0.2 mL, 0.6 mg/mL) for different time. The white dotted circle indicated tumors. (b) NIR fluorescence (NIRF) intensity of tumors from Panc02 tumor-bearing mice at different post-injection time (n = 3). Data are presented as mean values ± SD. Source data are provided as a Source Data file.

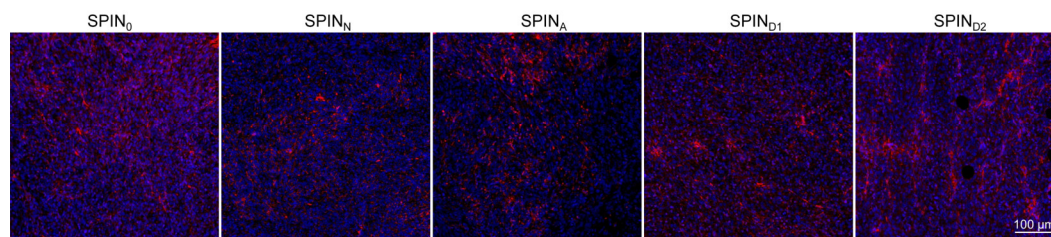

**Supplementary Figure 28. Tumor accumulation of SPINs.** Confocal fluorescence images of tumors from Panc02 tumor-bearing mice after systemic injection of SPINs (0.2 mL, 0.6 mg/mL) via tail vein for 24 h. The cell nucleus stained with 4',6-diamidino-2-phenylindole (DAPI) shows blue fluorescence signal and nanoparticles shows red fluorescence signal. The experiments were repeated independently three times with similar results.



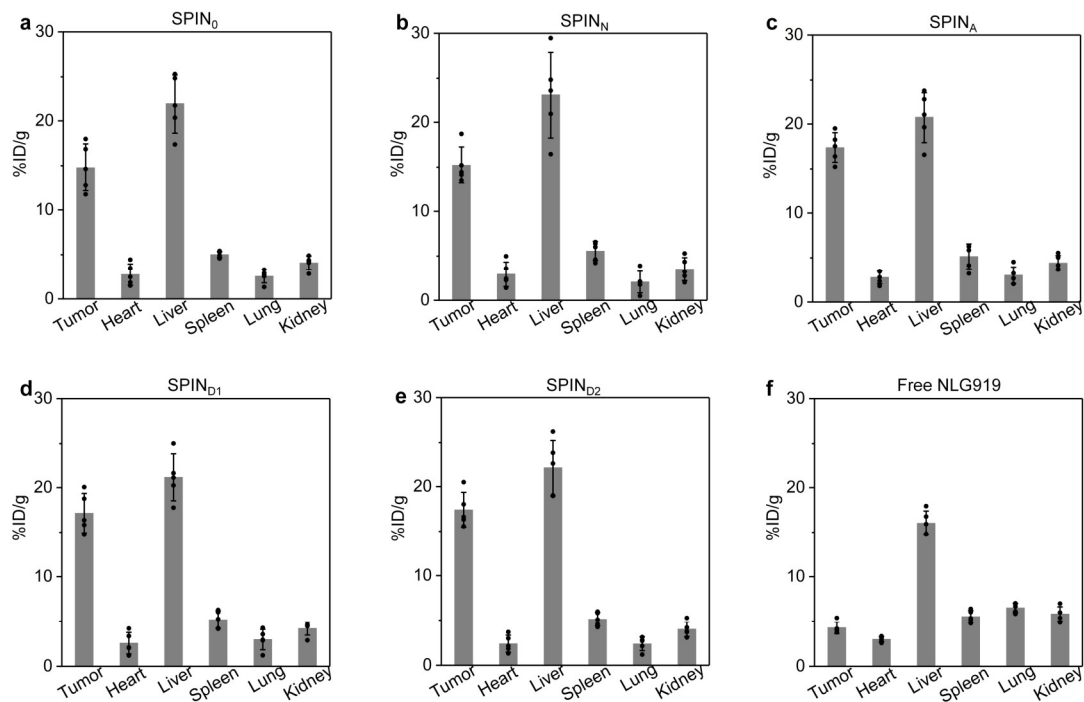

**Supplementary Figure 29. In vivo biodistribution of SPINs.** In vivo biodistribution of SPIN<sub>0</sub> (a), SPIN<sub>N</sub> (b), SPIN<sub>A</sub> (c), SPIN<sub>D1</sub> (d), SPIN<sub>D2</sub> (e) and free NLG919 (f) in subcutaneous Panc02 tumor-bearing mice (n = 5) at 24 h after systemic administration. Data are presented as mean values ± SD. Source data are provided as a Source Data file.

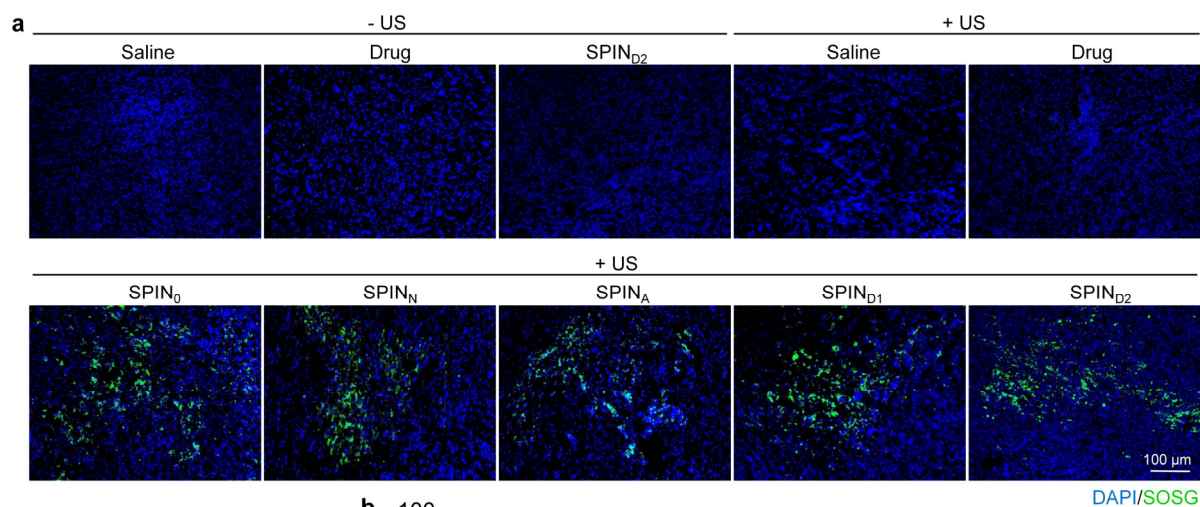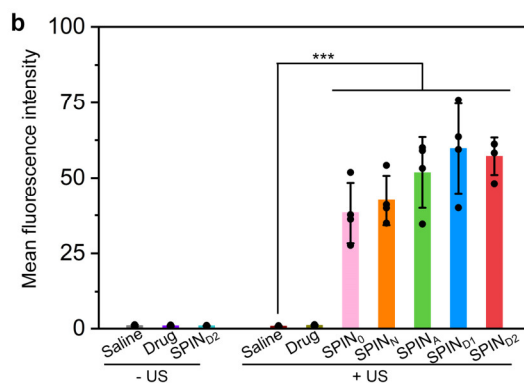

**Supplementary Figure 30. Intratumor <sup>1</sup>O<sub>2</sub> generation.** (a) Representative confocal fluorescence

images of tumor sections from subcutaneous Panc02 tumor-bearing mice after systemic injection of saline, free drug mixture (4 mg/kg body weight for NLG919 and aPD-L1) or SPINs (0.2 mL, 0.6 mg/mL) via tail vein with or without US irradiation (1.0 MHz, 1.2 W/cm<sup>2</sup>, 50% duty cycle, 10 min). The US irradiation of tumor tissues was conducted at 24 h post-injection time. The cell nucleus stained with DAPI shows blue fluorescence signal and SOSG shows green fluorescence signal. **(b)** Mean fluorescence intensity of SOSG in tumors of mice after different treatments (n = 4). Saline + US versus SPIN<sub>0</sub> + US:  $P < 0.0001$ ; Saline + US versus SPIN<sub>N</sub> + US:  $P < 0.0001$ ; Saline + US versus SPIN<sub>A</sub> + US:  $P < 0.0001$ ; Saline + US versus SPIN<sub>D1</sub> + US:  $P < 0.0001$ ; Saline + US versus SPIN<sub>D2</sub> + US:  $P < 0.0001$ . Data are presented as mean values  $\pm$  SD. Statistical significance was calculated via one-way ANOVA with a Tukey post-hoc test; \*\*\* $P < 0.001$ . Source data are provided as a Source Data file.

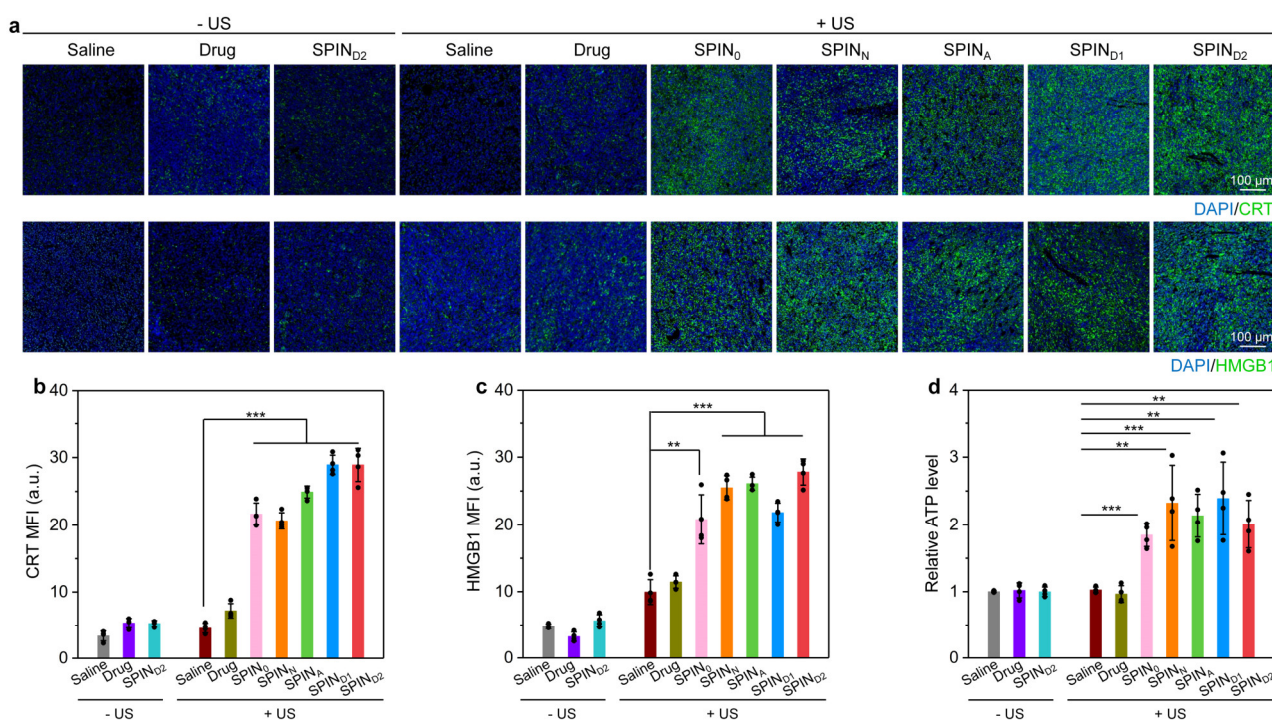

**Supplementary Figure 31. Sonodynamically induced ICD.** (a) Immunofluorescence CRT and HMGB1 staining images of tumor sections from Panc02 tumor-bearing mice after systemic injection of saline, free drug mixture (4 mg/kg body weight for NLG919 and aPD-L1) or SPINs (0.2 mL, 0.6 mg/mL) via tail vein with or without US irradiation (1.0 MHz, 1.2 W/cm<sup>2</sup>, 50% duty cycle, 10 min). The assay was conducted at 24 h after treatments. The cell nucleus stained by DAPI shows blue fluorescence signal, CRT and HMGB1 stained by corresponding antibodies show green fluorescence signal. **(b-c)** Mean fluorescence intensity (MFI) of CRT **(b)** and HMGB1 **(c)** staining in tumor sections from different groups (n = 4). Saline + US versus SPIN<sub>0</sub> + US:  $P < 0.0001$ ; Saline +

US versus SPIN<sub>N</sub> + US:  $P < 0.0001$ ; Saline + US versus SPIN<sub>A</sub> + US:  $P < 0.0001$ ; Saline + US versus SPIN<sub>D1</sub> + US:  $P < 0.0001$ ; Saline + US versus SPIN<sub>D2</sub> + US:  $P < 0.0001$  for CRT (b); Saline + US versus SPIN<sub>0</sub> + US:  $P = 0.0018$ ; Saline + US versus SPIN<sub>N</sub> + US:  $P < 0.0001$ ; Saline + US versus SPIN<sub>A</sub> + US:  $P < 0.0001$ ; Saline + US versus SPIN<sub>D1</sub> + US:  $P < 0.0001$ ; Saline + US versus SPIN<sub>D2</sub> + US:  $P < 0.0001$  for HMGB1 (c). (d) Relative ATP levels in subcutaneous Panc02 tumors (n = 4) after different treatments for 24 h. Saline + US versus SPIN<sub>0</sub> + US:  $P < 0.0001$ ; Saline + US versus SPIN<sub>N</sub> + US:  $P = 0.0036$ ; Saline + US versus SPIN<sub>A</sub> + US:  $P < 0.0001$ ; Saline + US versus SPIN<sub>D1</sub> + US:  $P = 0.0023$ ; Saline + US versus SPIN<sub>D2</sub> + US:  $P = 0.0015$ . Data are presented as mean values  $\pm$  SD. Statistical significance was calculated via one-way ANOVA with a Tukey post-hoc test; \*\* $P < 0.01$ , \*\*\* $P < 0.001$ . Source data are provided as a Source Data file.

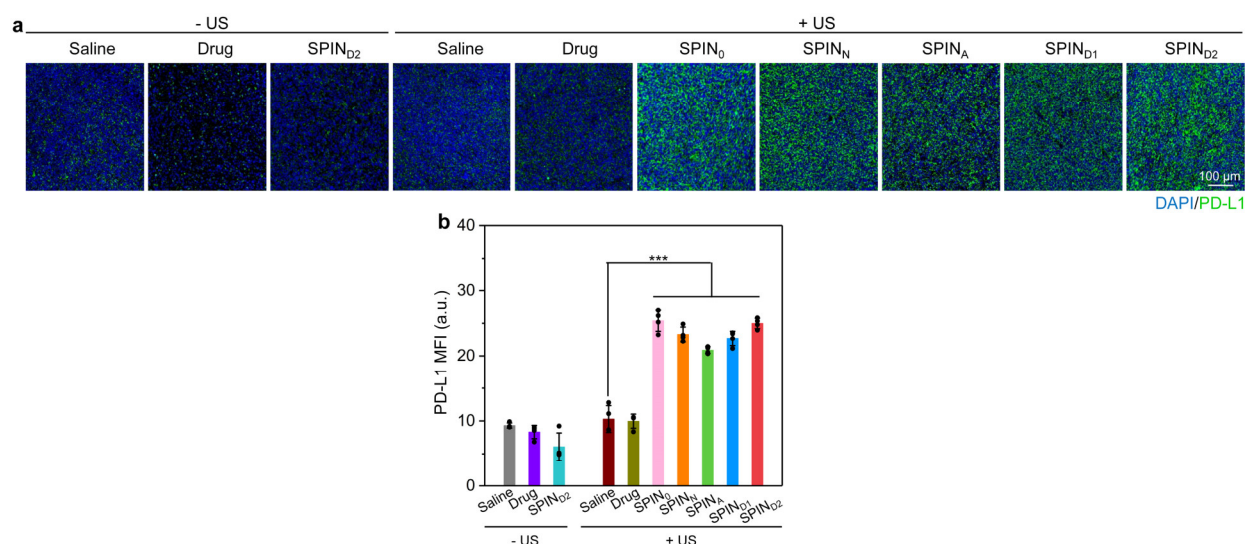

**Supplementary Figure 32. Evaluation of PD-L1 expression.** (a) Immunofluorescence PD-L1 staining images of tumor sections from Panc02 tumor-bearing mice after systemic injection of saline, free drug mixture (4 mg/kg body weight for NLG919 and aPD-L1) or SPINs (0.2 mL, 0.6 mg/mL) via tail vein with or without US irradiation (1.0 MHz, 1.2 W/cm<sup>2</sup>, 50% duty cycle, 10 min). The cell nucleus stained by DAPI shows blue fluorescence signal, PD-L1 stained by corresponding antibody shows green fluorescence signal. (b) MFI of PD-L1 staining in tumor sections after different treatments (n = 4). Saline + US versus SPIN<sub>0</sub> + US:  $P < 0.0001$ ; Saline + US versus SPIN<sub>N</sub> + US:  $P < 0.0001$ ; Saline + US versus SPIN<sub>A</sub> + US:  $P < 0.0001$ ; Saline + US versus SPIN<sub>D1</sub> + US:  $P < 0.0001$ ; Saline + US versus SPIN<sub>D2</sub> + US:  $P < 0.0001$ . Data are presented as mean values  $\pm$  SD. Statistical significance was calculated via one-way ANOVA with a Tukey post-hoc test; \*\*\* $P < 0.001$ . Source data are provided as a Source Data file.



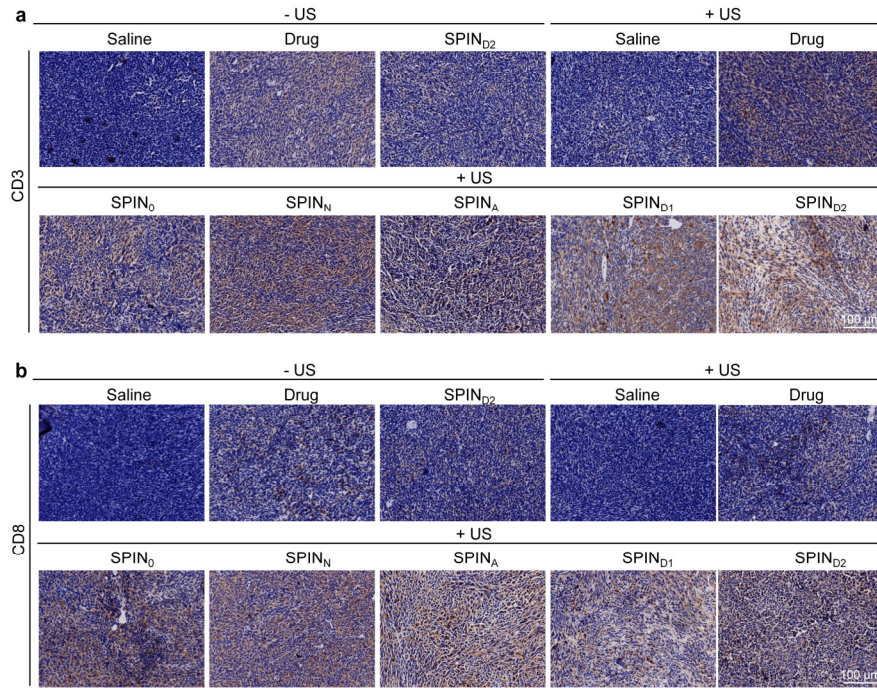

**Supplementary Figure 33. Study of sonodynamically induced tumor-infiltrating lymphocytes in tumor tissues.** Representative immunohistochemical staining images of CD3<sup>+</sup> (a) and CD8<sup>+</sup> (b) tumor-infiltrating lymphocytes in tumor tissues from tumor-bearing mice after different treatments for 3 days. Brown staining represents CD3<sup>+</sup> and CD8<sup>+</sup> tumor-infiltrating lymphocytes. The experiments in a and b were repeated independently three times with similar results.

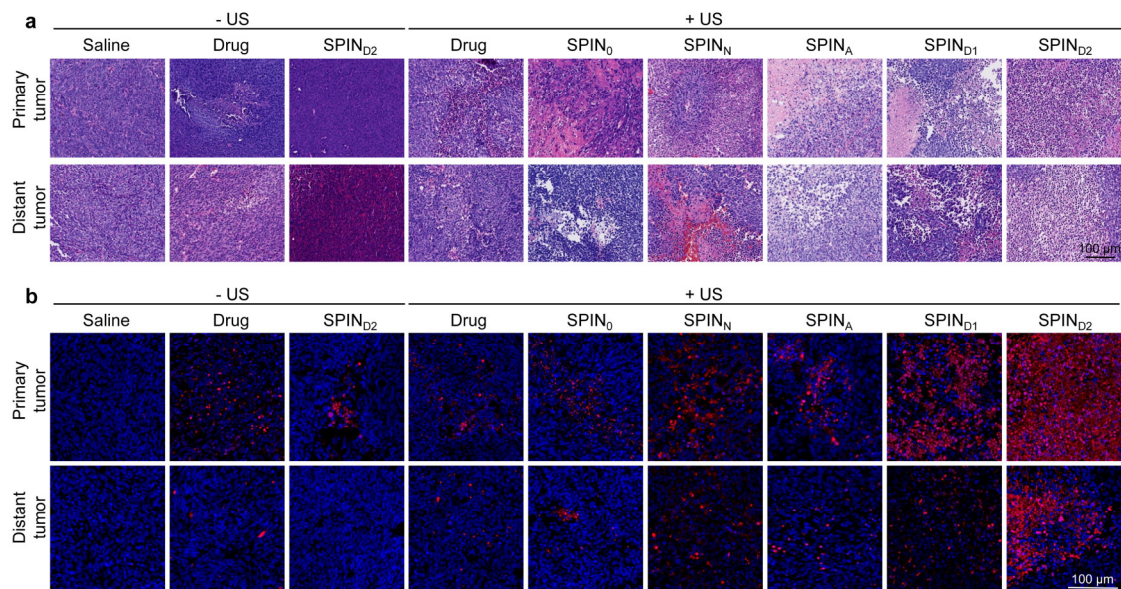

**Supplementary Figure 34. Histological analysis of tumors after different treatments.** (a) H&E staining images of primary and distant tumors of Panc02 tumor-bearing C57BL/6 mice after systemic injection of saline, free drug mixture (4 mg/kg body weight for NLG919 and aPD-L1), or SPINs (0.2 mL, 0.6 mg/mL) with or without US irradiation (1.0 MHz, 1.2 W/cm<sup>2</sup>, 50% duty cycle, 10 min). (b) TUNEL staining images of primary and distant tumors of mice after different treatments. The cell

nucleus stained by DAPI shows blue fluorescence signal, TUNEL stained by corresponding antibody shows red fluorescence signal. The experiments in a and b were repeated independently three times with similar results.

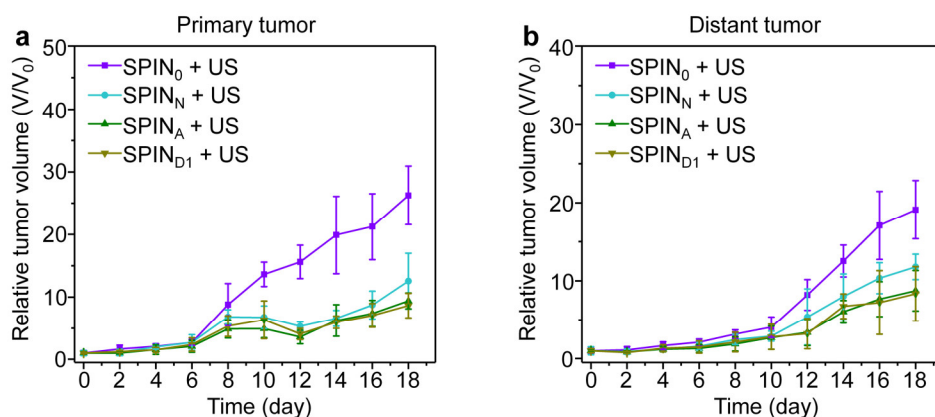

**Supplementary Figure 35. Evaluation of tumor growth inhibition efficacy.** Relative tumor volumes of primary (a) and distant (b) tumors of Panc02 tumor-bearing C57BL/6 mice ( $n = 6$ ) after systemic injection of  $SPIN_0$ ,  $SPIN_N$ ,  $SPIN_A$ , or  $SPIN_{D1}$  (0.2 mL, 0.6 mg/mL) with US irradiation (1.0 MHz, 1.2 W/cm<sup>2</sup>, 50% duty cycle, 10 min). Data are presented as mean values  $\pm$  SD. Source data are provided as a Source Data file.

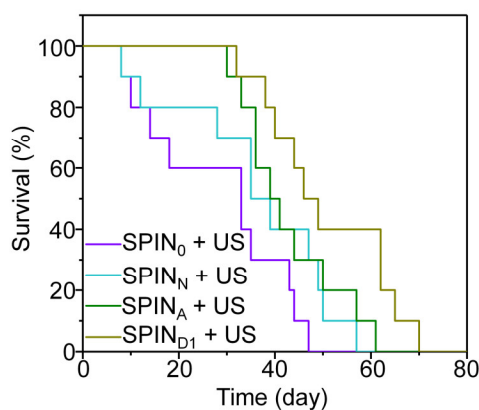

**Supplementary Figure 36. Evaluation of survival of mice after different treatments.** Survival curves of Panc02 tumor-bearing C57BL/6 mice ( $n = 10$ ) after systemic injection of  $SPIN_0$ ,  $SPIN_N$ ,  $SPIN_A$ , or  $SPIN_{D1}$  (0.2 mL, 0.6 mg/mL) with US irradiation (1.0 MHz, 1.2 W/cm<sup>2</sup>, 50% duty cycle, 10 min). Source data are provided as a Source Data file.

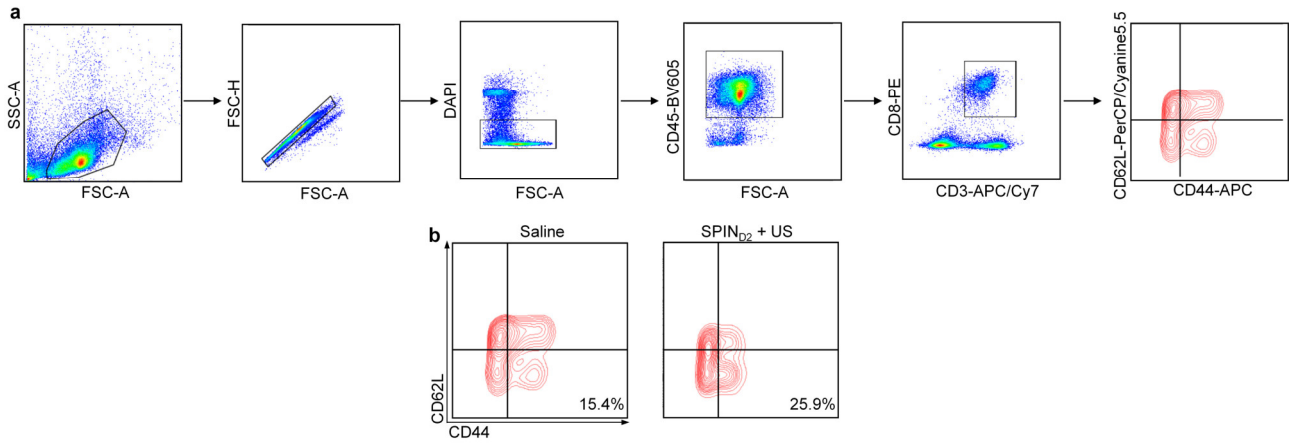

**Supplementary Figure 37. Flow cytometry analysis of effector memory T cells. (a)** Gating strategy for flow cytometry analysis of effector memory T cells. **(b)** Representative flow cytometry plots of effector memory T cells (CD44<sup>+</sup>CD62L<sup>+</sup>) in spleen of Panc02 tumor-bearing mice after different treatments followed by tumor rechallenge.

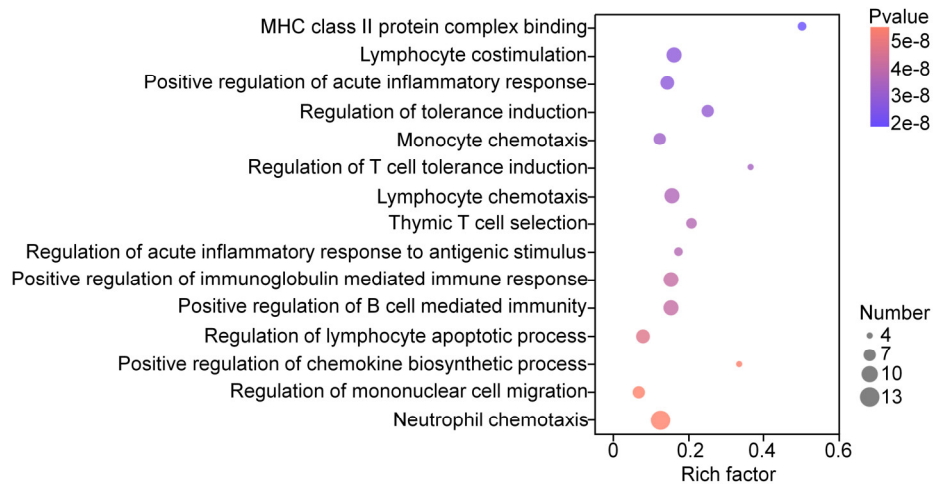

**Supplementary Figure 38. Gene expression assay of immune-related genes.** GO enrichment analysis of differentially upregulated genes associated with immune processes. Statistical significance was calculated via two-tailed Student's t-test.



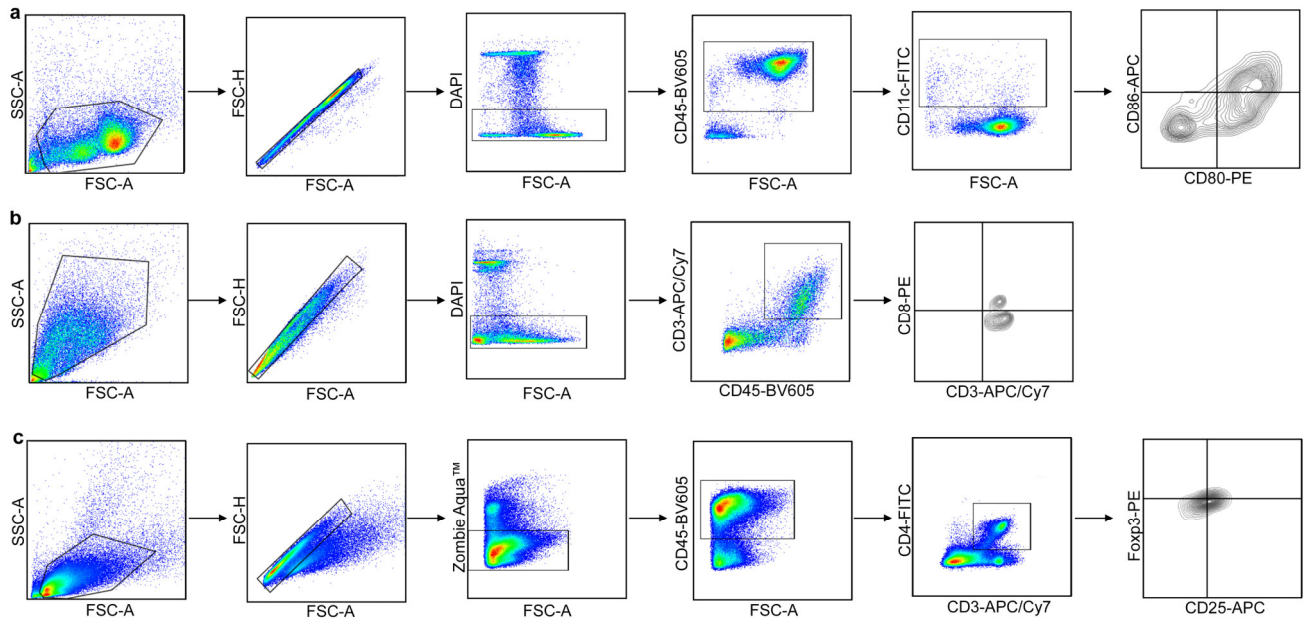

**Supplementary Figure 39. Gating strategy for flow cytometry analysis.** Gating strategy for flow cytometry analysis of matured DCs (a), CD3<sup>+</sup>CD8<sup>+</sup> CTLs (b) and T<sub>reg</sub> cells (c).

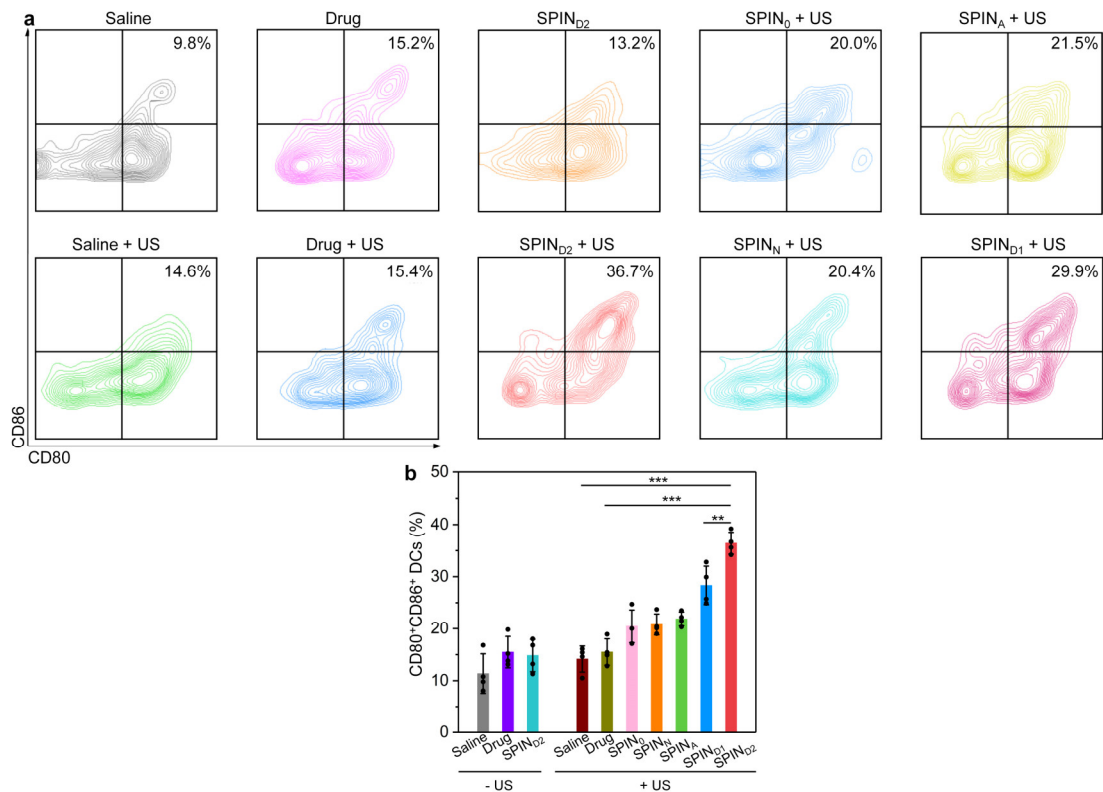

**Supplementary Figure 40. Flow cytometry analysis of matured DCs.** (a) Representative flow cytometry plots of matured DCs (CD80<sup>+</sup>CD86<sup>+</sup> gating on CD11c<sup>+</sup>) in tumor-draining lymph nodes of Panc02 tumor-bearing C57BL/6 mice after different treatments. (b) Populations of CD80<sup>+</sup>CD86<sup>+</sup> DCs in tumor-draining lymph nodes of mice after different treatments (n = 4). Saline + US versus SPIN<sub>D2</sub> + US:  $P < 0.0001$ ; Drug + US versus SPIN<sub>D2</sub> + US:  $P < 0.0001$ ; SPIN<sub>D1</sub> + US versus SPIN<sub>D2</sub> + US:  $P = 0.0090$ . Data are presented as mean values  $\pm$  SD. Statistical significance was calculated via two-tailed Student's t-test; \*\* $P < 0.01$ , \*\*\* $P < 0.001$ . Source data are provided as a Source Data file.

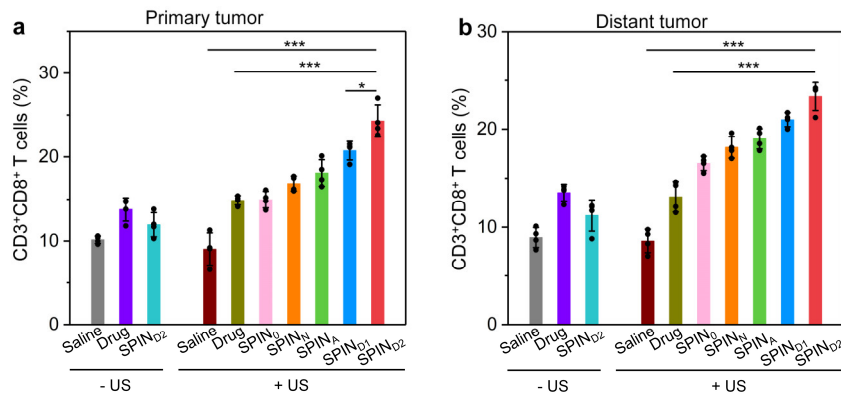

**Supplementary Figure 41. Flow cytometry analysis of CTLs.** Populations of CD3<sup>+</sup>CD8<sup>+</sup> T cells in primary tumors (a) and distant tumors (b) of mice after different treatments (n = 4). Saline + US versus SPIN<sub>D2</sub> + US:  $P < 0.0001$ ; Drug + US versus SPIN<sub>D2</sub> + US:  $P < 0.0001$ ; SPIN<sub>D1</sub> + US versus SPIN<sub>D2</sub> + US:  $P = 0.0183$  for primary tumors (a); Saline + US versus SPIN<sub>D2</sub> + US:  $P < 0.0001$ ; Drug + US versus SPIN<sub>D2</sub> + US:  $P < 0.0001$  for distant tumors (b). Data are presented as mean values  $\pm$  SD. Statistical significance was calculated via two-tailed Student's t-test; \* $P < 0.05$ , \*\*\* $P < 0.001$ . Source data are provided as a Source Data file.

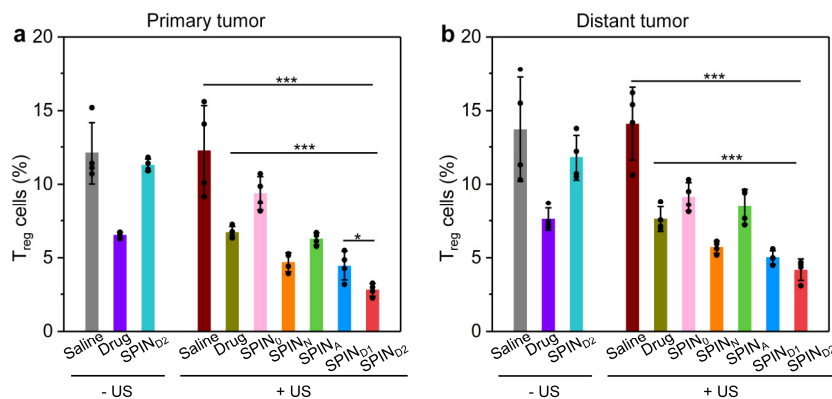

**Supplementary Figure 42. Flow cytometry analysis of T<sub>reg</sub> cells.** Populations of T<sub>reg</sub> cells in primary tumors (a) and distant tumors (b) of mice after different treatments (n = 4). Saline + US versus SPIN<sub>D2</sub> + US:  $P < 0.0001$ ; Drug + US versus SPIN<sub>D2</sub> + US:  $P < 0.0001$ ; SPIN<sub>D1</sub> + US versus SPIN<sub>D2</sub> + US:  $P = 0.0216$  for primary tumors (a); Saline + US versus SPIN<sub>D2</sub> + US:  $P < 0.0001$ ; Drug + US versus SPIN<sub>D2</sub> + US:  $P < 0.0001$  for distant tumors (b). Data are presented as mean values  $\pm$  SD. Statistical significance was calculated via two-tailed Student's t-test; \* $P < 0.05$ , \*\*\* $P < 0.001$ . Source data are provided as a Source Data file.



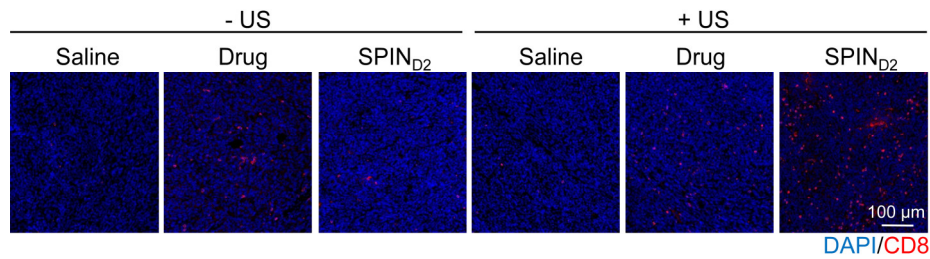

**Supplementary Figure 43. Evaluation of CD8<sup>+</sup> T cells in tumor tissues.** Immunofluorescence CD8 staining images of tumor sections from Panc02 tumor-bearing mice after systemic injection of saline, free drug mixture (4 mg/kg body weight for NLG919 and aPD-L1) or SPIN<sub>D2</sub> (0.2 mL, 0.6 mg/mL) via tail vein with or without US irradiation (1.0 MHz, 1.2 W/cm<sup>2</sup>, 50% duty cycle, 10 min). The cell nucleus stained by DAPI shows blue fluorescence signal, CD8 stained by corresponding antibody show red fluorescence signal. The experiments were repeated independently three times with similar results.

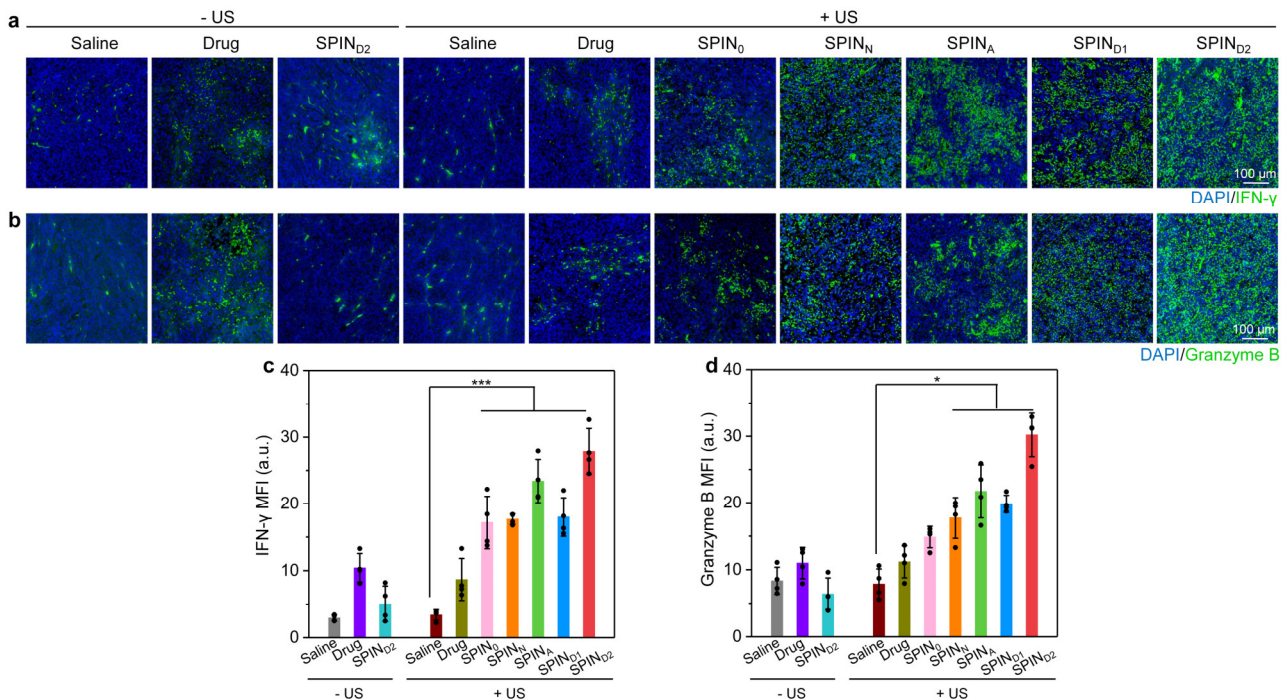

**Supplementary Figure 44. Evaluation of IFN- $\gamma$  and Granzyme B expression levels in tumors.** (a,b) Immunofluorescence IFN- $\gamma$  (a) and Granzyme B (b) staining images of tumor sections from Panc02 tumor-bearing mice after systemic injection of saline, free drug mixture (4 mg/kg body weight for NLG919 and aPD-L1) or SPINs (0.2 mL, 0.6 mg/mL) via tail vein with or without US irradiation (1.0 MHz, 1.2 W/cm<sup>2</sup>, 50% duty cycle, 10 min). The cell nucleus stained by DAPI shows blue fluorescence signal, IFN- $\gamma$  and Granzyme B stained by corresponding antibodies show green fluorescence signal. (c,d) MFI of IFN- $\gamma$  (c) and Granzyme B (d) staining in tumor sections from different groups (n = 4). Saline + US versus SPIN<sub>0</sub> + US:  $P < 0.0001$ ; Saline + US versus SPIN<sub>N</sub> + US:

$P < 0.0001$ ; Saline + US versus SPIN<sub>A</sub> + US:  $P < 0.0001$ ; Saline + US versus SPIN<sub>D1</sub> + US:  $P < 0.0001$ ; Saline + US versus SPIN<sub>D2</sub> + US:  $P < 0.0001$  for IFN- $\gamma$  (c); Saline + US versus SPIN<sub>N</sub> + US:  $P = 0.0161$ ; Saline + US versus SPIN<sub>A</sub> + US:  $P < 0.0001$ ; Saline + US versus SPIN<sub>D1</sub> + US:  $P = 0.0023$ ; Saline + US versus SPIN<sub>D2</sub> + US:  $P < 0.0001$  for Granzyme B (d). Data are presented as mean values  $\pm$  SD. Statistical significance was calculated via one-way ANOVA with a Tukey post-hoc test; \* $P < 0.05$ , \*\*\* $P < 0.001$ . Source data are provided as a Source Data file.

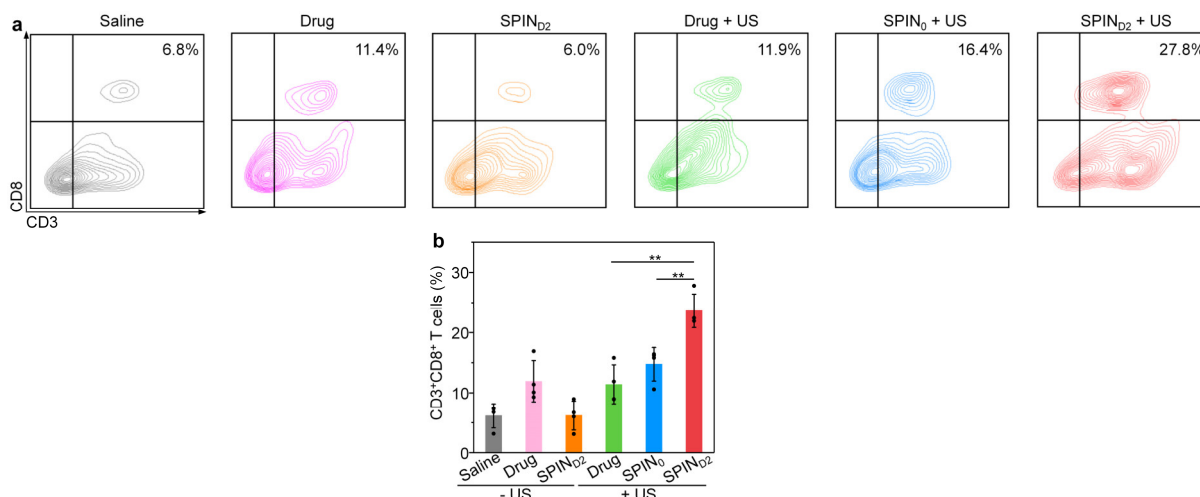

**Supplementary Figure 45. Flow cytometry analysis of CTLs after deep-tissue therapy using SPINs.** (a) Representative flow cytometry plots of CTLs (CD3<sup>+</sup>CD8<sup>+</sup> gating on CD45<sup>+</sup>) in 5-cm tissue covered tumors from Panc02 tumor-bearing mice after systemic injection of saline, free drug mixture (4 mg/kg body weight for NLG919 and aPD-L1), SPIN<sub>0</sub> or SPIN<sub>D2</sub> (0.2 mL, 0.6 mg/mL) with or without US irradiation (1.0 MHz, 1.2 W/cm<sup>2</sup>, 50% duty cycle, 10 min). (b) Populations of CD3<sup>+</sup>CD8<sup>+</sup> T cells in 5-cm tissue covered tumors of mice after different treatments (n = 4). Drug + US versus SPIN<sub>D2</sub> + US:  $P = 0.0012$ ; SPIN<sub>0</sub> + US versus SPIN<sub>D2</sub> + US:  $P = 0.0041$ . Data are presented as mean values  $\pm$  SD. Statistical significance was calculated via two-tailed Student's t-test; \*\* $P < 0.01$ . Source data are provided as a Source Data file.

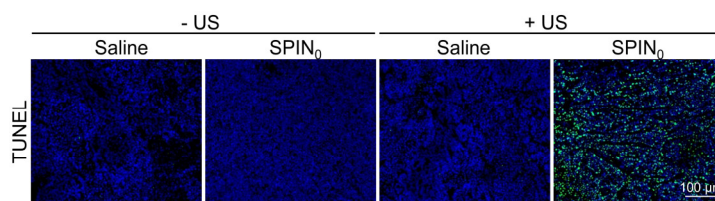

**Supplementary Figure 46. Histological analysis of orthotopic pancreatic rabbit tumors after different treatments.** Immunofluorescence TUNEL staining images of orthotopic pancreatic rabbit

tumors after different treatments. The cell nucleus stained by DAPI shows blue fluorescence signal, TUNEL stained by corresponding antibody shows green fluorescence signal. The experiments were repeated independently three times with similar results.

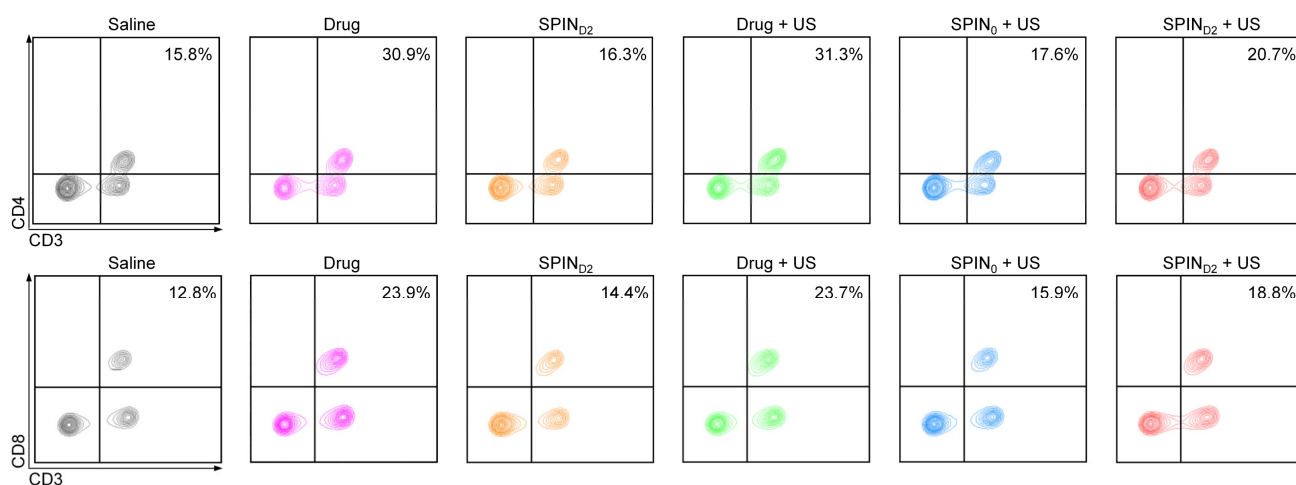

**Supplementary Figure 47. Evaluation of T cells in blood.** Representative flow cytometry plots of CD3<sup>+</sup>CD4<sup>+</sup> and CD3<sup>+</sup>CD8<sup>+</sup> T cells in blood of mice at day 30 after systemic administrations of saline, SPIN<sub>0</sub>, SPIN<sub>D2</sub> (0.2 mL, 1.2 mg/mL) or free drug mixture (8 mg/kg body weight for NLG919 and aPD-L1) with or without US irradiation (1.0 MHz, 1.2 W/cm<sup>2</sup>, 50% duty cycle, 10 min).

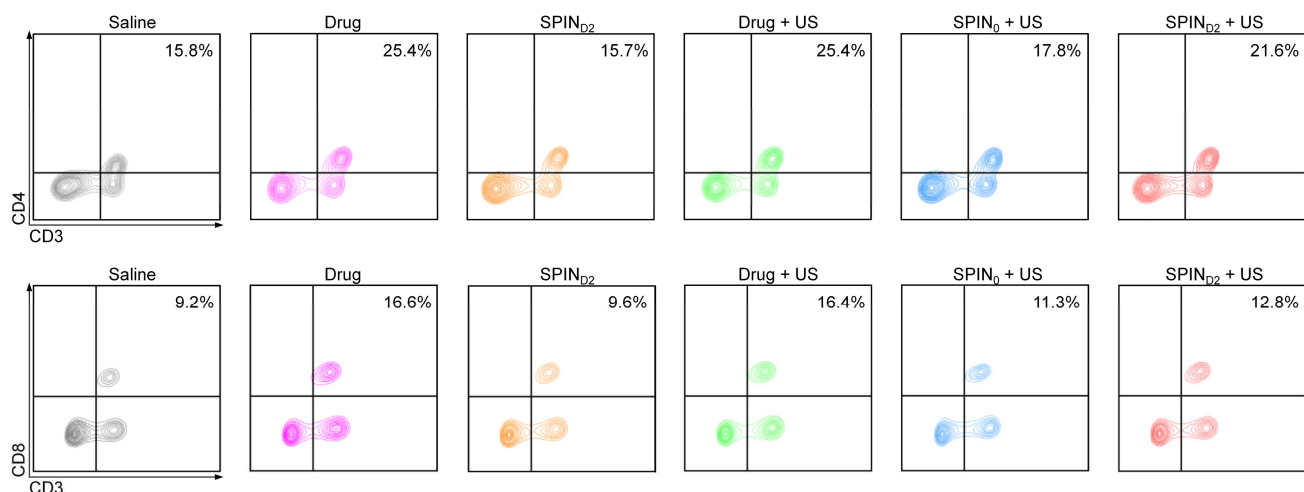

**Supplementary Figure 48. Evaluation of T cells in spleen.** Representative flow cytometry plots of CD3<sup>+</sup>CD4<sup>+</sup> and CD3<sup>+</sup>CD8<sup>+</sup> T cells in spleen of mice at day 30 after systemic administrations of saline, SPIN<sub>0</sub>, SPIN<sub>D2</sub> (0.2 mL, 1.2 mg/mL) or free drug mixture (8 mg/kg body weight for NLG919 and aPD-L1) with or without US irradiation (1.0 MHz, 1.2 W/cm<sup>2</sup>, 50% duty cycle, 10 min).



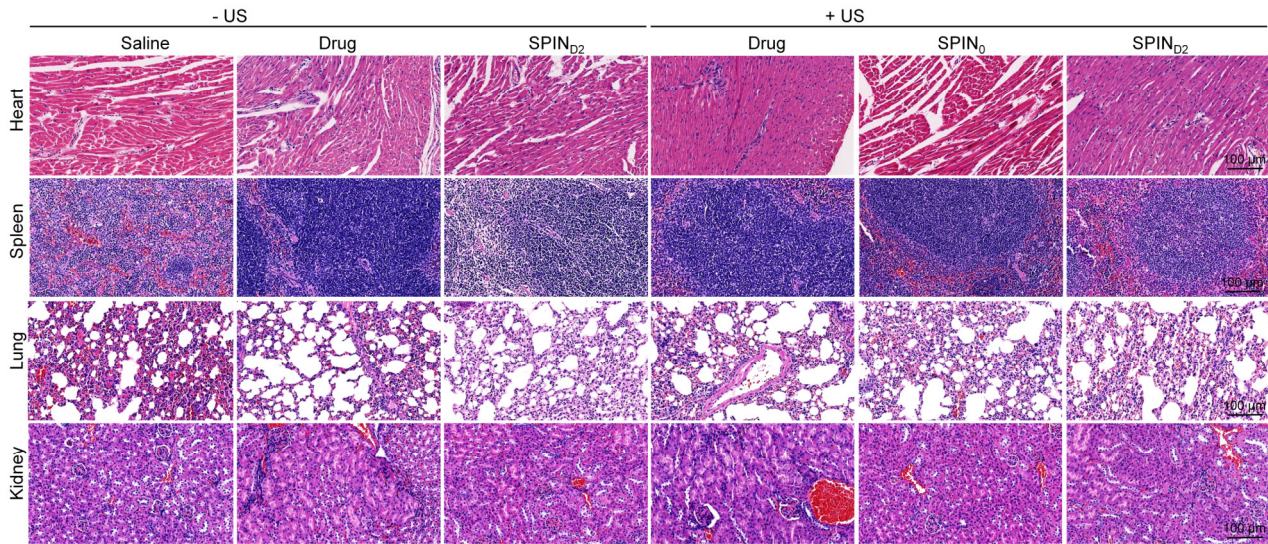

**Supplementary Figure 49. In vivo biocompatibility studies by histological analysis.** Representative H&E staining images of heart, spleen, lung and kidney of mice at day 30 after systemic administrations of saline, SPIN<sub>0</sub>, SPIN<sub>D2</sub> (0.2 mL, 1.2 mg/mL) or free drug mixture (8 mg/kg body weight for NLG919 and aPD-L1) with or without US irradiation (1.0 MHz, 1.2 W/cm<sup>2</sup>, 50% duty cycle, 10 min). The experiments were repeated independently three times with similar results.

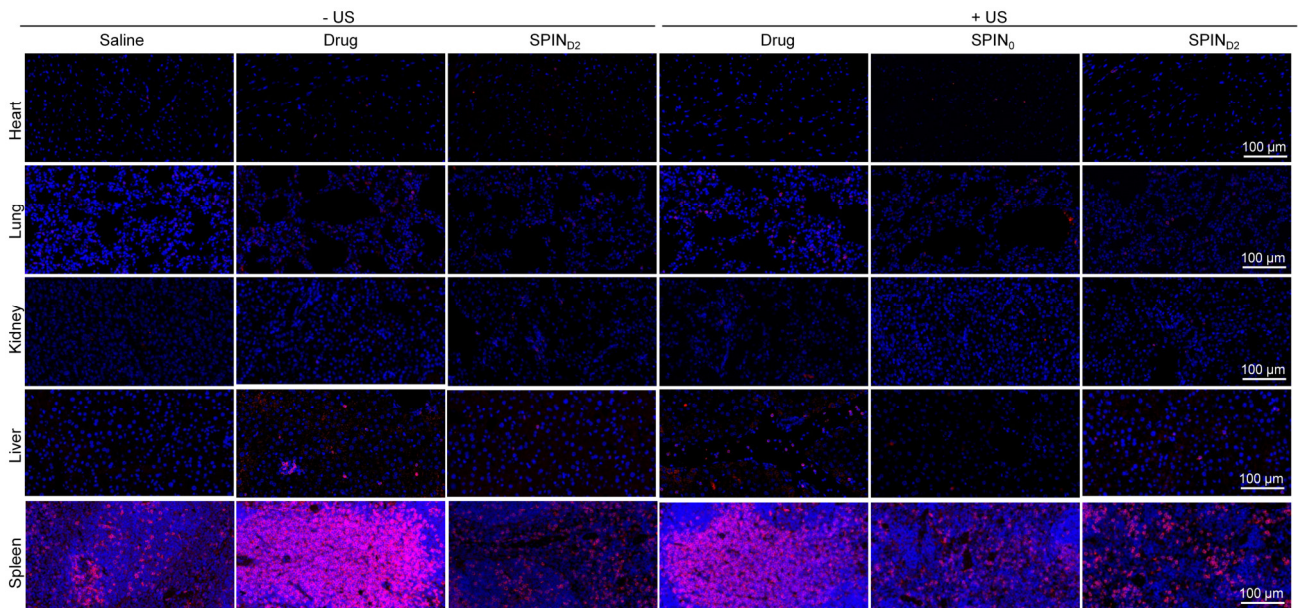

**Supplementary Figure 50. CD3<sup>+</sup> T cell infiltration studies by immunofluorescence imaging.** Representative immunofluorescence CD3 staining images of heart, liver, spleen, lung and kidney of mice at day 30 after systemic administrations of saline, SPIN<sub>0</sub>, SPIN<sub>D2</sub> (0.2 mL, 1.2 mg/mL) or free drug mixture (8 mg/kg body weight for NLG919 and aPD-L1) with or without US irradiation (1.0 MHz, 1.2 W/cm<sup>2</sup>, 50% duty cycle, 10 min). Cell nucleus stained by DAPI shows blue fluorescence signal; CD3 stained by the corresponding antibody shows red fluorescence signal. The experiments were

repeated independently four times with similar results.

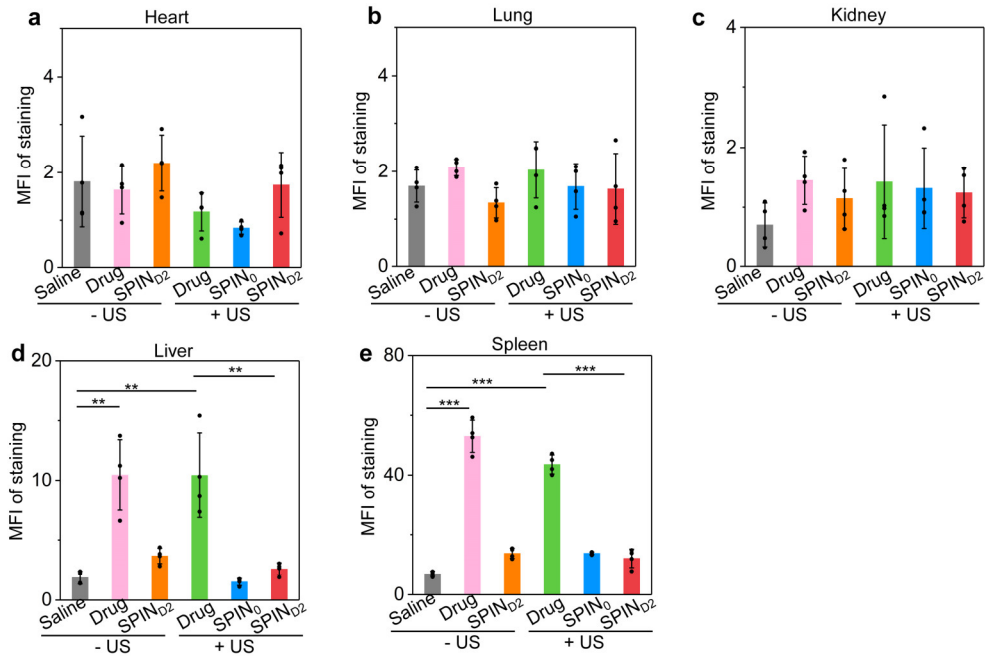

**Supplementary Figure 51. CD3<sup>+</sup> T cell infiltration quantification in major organs.** Relative MFI for CD3 staining in heart (a), lung (b), kidney (c), liver (d) and spleen (e) of mice at day 30 after systemic administrations of saline, SPIN<sub>0</sub>, SPIN<sub>D2</sub> (0.2 mL, 1.2 mg/mL) or free drug mixture (8 mg/kg body weight for NLG919 and aPD-L1) with or without US irradiation (1.0 MHz, 1.2 W/cm<sup>2</sup>, 50% duty cycle, 10 min) (n = 4). Saline - US versus Drug - US:  $P = 0.0012$ ; Saline - US versus Drug + US:  $P = 0.0030$ ; Drug + US versus SPIN<sub>D2</sub> + US:  $P = 0.0047$  for liver (d); Saline - US versus Drug - US:  $P < 0.0001$ ; Saline - US versus Drug + US:  $P < 0.0001$ ; Drug + US versus SPIN<sub>D2</sub> + US:  $P < 0.0001$  for spleen (e). Data are presented as mean values  $\pm$  SD. Statistical significance was calculated via two-tailed Student's t-test; \*\* $P < 0.01$ , \*\*\* $P < 0.001$ . Source data are provided as a Source Data file.



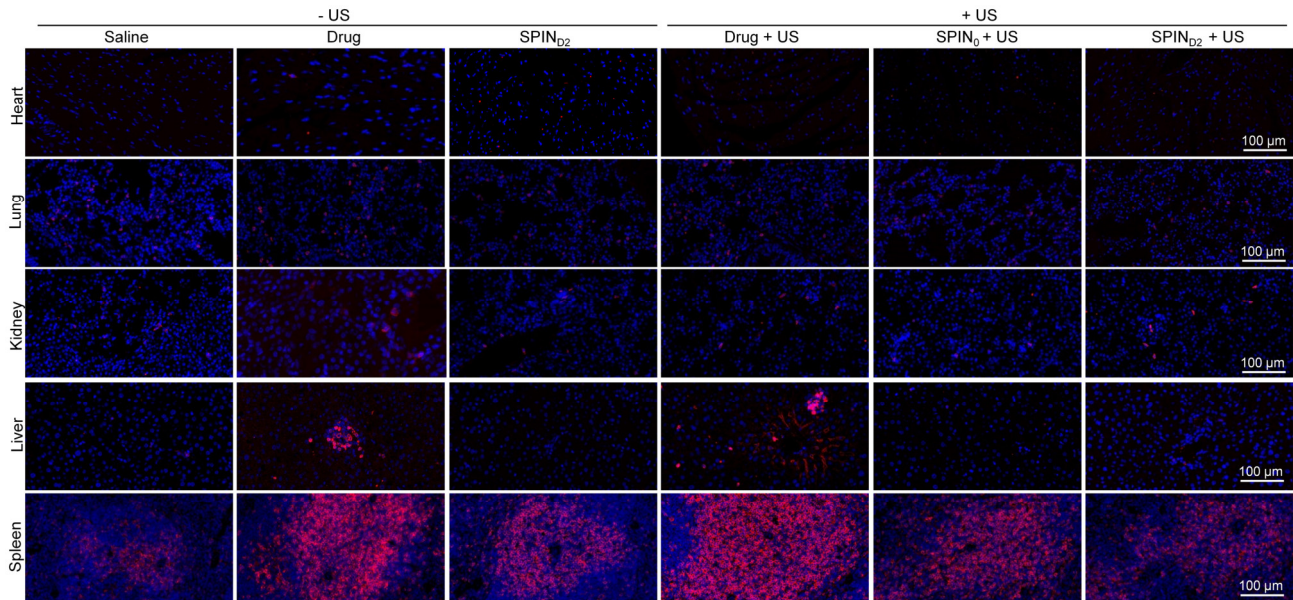

**Supplementary Figure 52. C4<sup>+</sup> T cell infiltration studies by immunofluorescence imaging.**

Representative immunofluorescence CD4 staining images of heart, liver, spleen, lung and kidney of mice at day 30 after systemic administrations of saline, SPIN<sub>0</sub>, SPIN<sub>D2</sub> (0.2 mL, 1.2 mg/mL) or free drug mixture (8 mg/kg body weight for NLG919 and aPD-L1) with or without US irradiation (1.0 MHz, 1.2 W/cm<sup>2</sup>, 50% duty cycle, 10 min). Cell nucleus stained by DAPI shows blue fluorescence signal; CD4 stained by the corresponding antibody shows red fluorescence signal. The experiments were repeated independently four times with similar results.

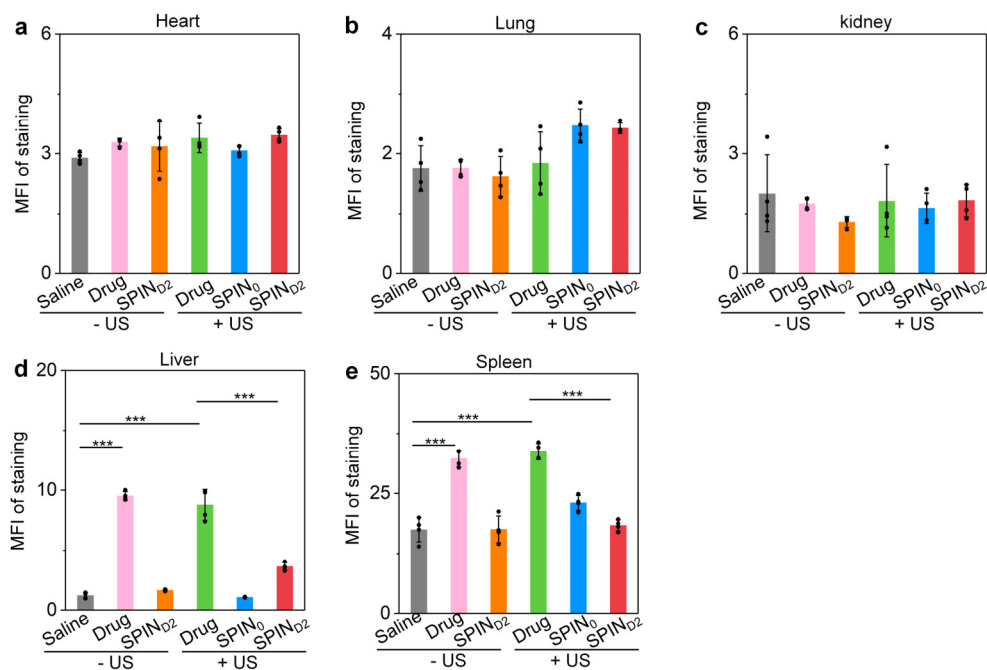

**Supplementary Figure 53. CD4<sup>+</sup> T cell infiltration quantification in major organs.** Relative MFI for CD4 staining in heart (a), lung (b), kidney (c), liver (d) and spleen (e) of mice at day 30 after

systemic administrations of saline, SPIN<sub>0</sub>, SPIN<sub>D2</sub> (0.2 mL, 1.2 mg/mL) or free drug mixture (8 mg/kg body weight for NLG919 and aPD-L1) with or without US irradiation (1.0 MHz, 1.2 W/cm<sup>2</sup>, 50% duty cycle, 10 min) (n = 4). Saline - US versus Drug - US:  $P < 0.0001$ ; Saline - US versus Drug + US:  $P < 0.0001$ ; Drug + US versus SPIN<sub>D2</sub> + US:  $P = 0.0002$  for liver (**d**); Saline - US versus Drug - US:  $P < 0.0001$ ; Saline - US versus Drug + US:  $P < 0.0001$ ; Drug + US versus SPIN<sub>D2</sub> + US:  $P < 0.0001$  for spleen (**e**). Data are presented as mean values  $\pm$  SD. Statistical significance was calculated via two-tailed Student's t-test; \*\*\* $P < 0.001$ . Source data are provided as a Source Data file.

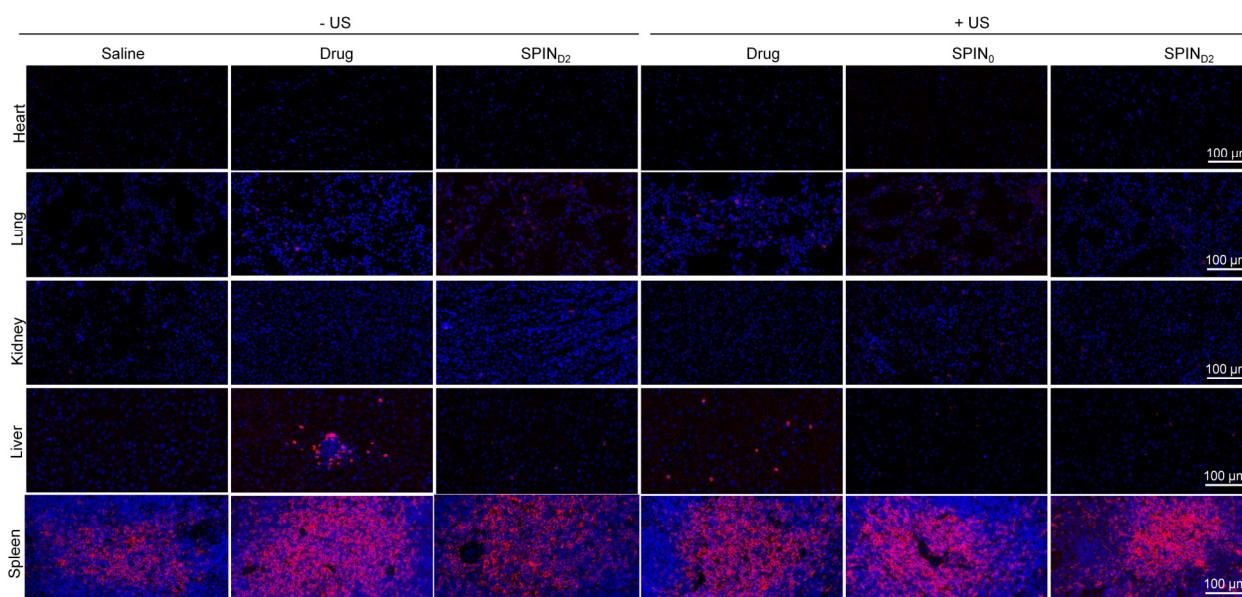

**Supplementary Figure 54. C8<sup>+</sup> T cell infiltration studies by immunofluorescence imaging.**

Representative immunofluorescence CD8 staining images of heart, liver, spleen, lung and kidney of mice at day 30 after systemic administrations of saline, SPIN<sub>0</sub>, SPIN<sub>D2</sub> (0.2 mL, 1.2 mg/mL) or free drug mixture (8 mg/kg body weight for NLG919 and aPD-L1) with or without US irradiation (1.0 MHz, 1.2 W/cm<sup>2</sup>, 50% duty cycle, 10 min). Cell nucleus stained by DAPI shows blue fluorescence signal; CD8 stained by the corresponding antibody shows red fluorescence signal. The experiments were repeated independently four times with similar results.

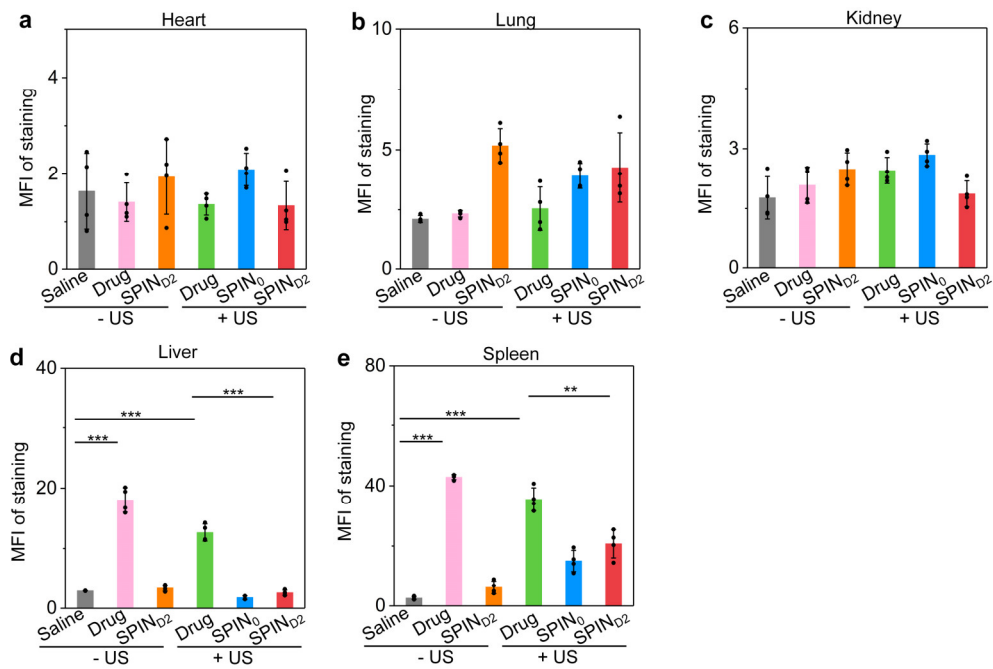

**Supplementary Figure 55. CD8<sup>+</sup> T cell infiltration quantification in major organs.** Relative MFI for CD8 staining in heart (a), lung (b), kidney (c), liver (d) and spleen (e) of mice at day 30 after systemic administrations of saline, SPIN<sub>0</sub>, SPIN<sub>D2</sub> (0.2 mL, 1.2 mg/mL) or free drug mixture (8 mg/kg body weight for NLG919 and aPD-L1) with or without US irradiation (1.0 MHz, 1.2 W/cm<sup>2</sup>, 50% duty cycle, 10 min) (n = 4). Saline - US versus Drug - US:  $P < 0.0001$ ; Saline - US versus Drug + US:  $P < 0.0001$ ; Drug + US versus SPIN<sub>D2</sub> + US:  $P < 0.0001$  for liver (d); Saline - US versus Drug - US:  $P < 0.0001$ ; Saline - US versus Drug + US:  $P < 0.0001$ ; Drug + US versus SPIN<sub>D2</sub> + US:  $P = 0.0028$  for spleen (e). Data are presented as mean values  $\pm$  SD. Statistical significance was calculated via two-tailed Student's t-test; \*\* $P < 0.01$ , \*\*\* $P < 0.001$ . Source data are provided as a Source Data file.



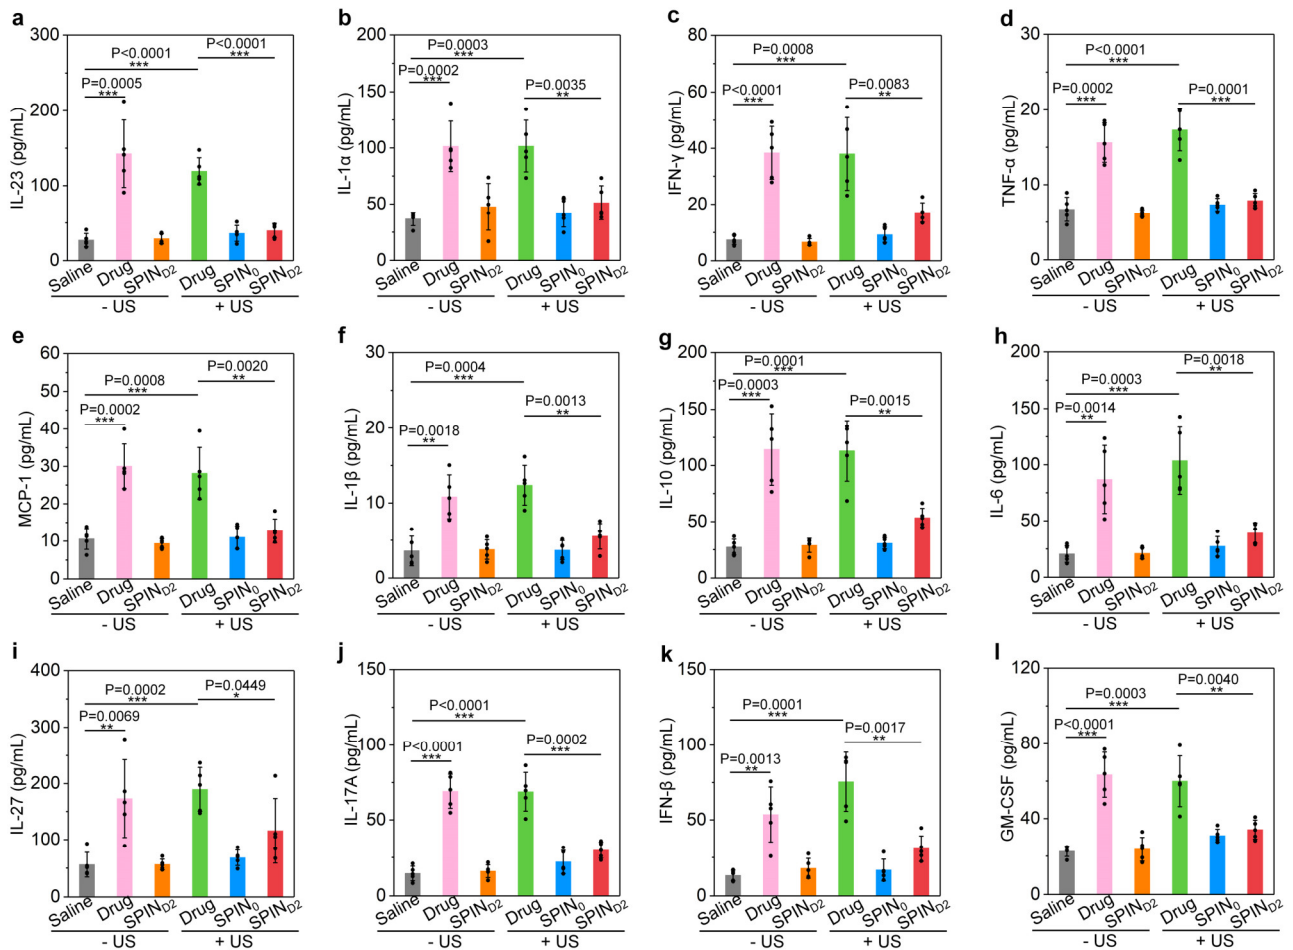

**Supplementary Figure 56. Evaluation of cytokine levels in serum.** The levels of IL-23 (a), IL-1 $\alpha$  (b), IFN- $\gamma$  (c), TNF- $\alpha$  (d), MCP-1 (e), IL-1 $\beta$  (f), IL-10 (g), IL-6 (h), IL-27 (i), IL-17A (j), IFN- $\beta$  (k) and GM-CSF (l) in serum of mice at day 30 after systemic administrations of saline, SPIN<sub>0</sub>, SPIN<sub>02</sub> (0.2 mL, 1.2 mg/mL) or free drug mixture (8 mg/kg body weight for NLG919 and aPD-L1) with or without US irradiation (1.0 MHz, 1.2 W/cm<sup>2</sup>, 50% duty cycle, 10 min) (n = 5). Data are presented as mean values  $\pm$  SD. Statistical significance was calculated via two-tailed Student's t-test; \* $P < 0.05$ , \*\* $P < 0.01$ , \*\*\* $P < 0.001$ . Source data are provided as a Source Data file.

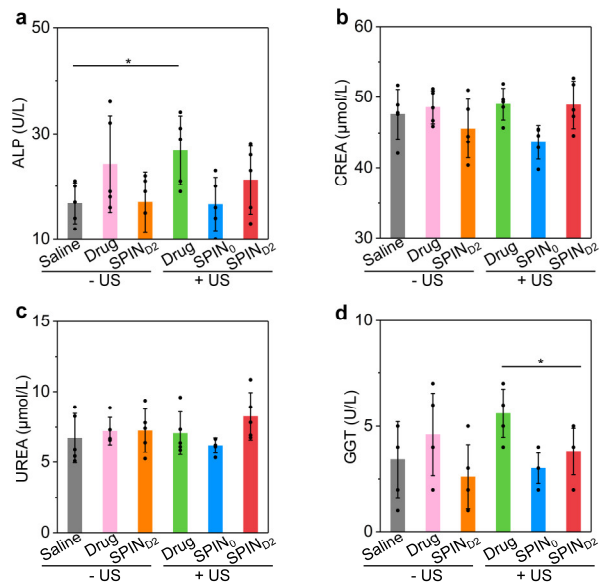

**Supplementary Figure 57. Blood biochemical analysis.** The levels of ALP (**a**), CREA (**b**), UREA (**c**), and GGT (**d**) in serum of mice at day 30 after systemic administrations of saline, SPIN<sub>0</sub>, SPIN<sub>D2</sub> (0.2 mL, 1.2 mg/mL) or free drug mixture (8 mg/kg body weight for NLG919 and aPD-L1) with or without US irradiation (1.0 MHz, 1.2 W/cm<sup>2</sup>, 50% duty cycle, 10 min) (n = 5). Saline - US versus Drug + US:  $P=0.0180$  for ALP (**a**); Drug + US versus SPIN<sub>D2</sub> + US:  $P=0.0344$  for GGT (**d**). Data are presented as mean values  $\pm$  SD. Statistical significance was calculated via two-tailed Student's t-test;  $*P < 0.05$ . Source data are provided as a Source Data file.

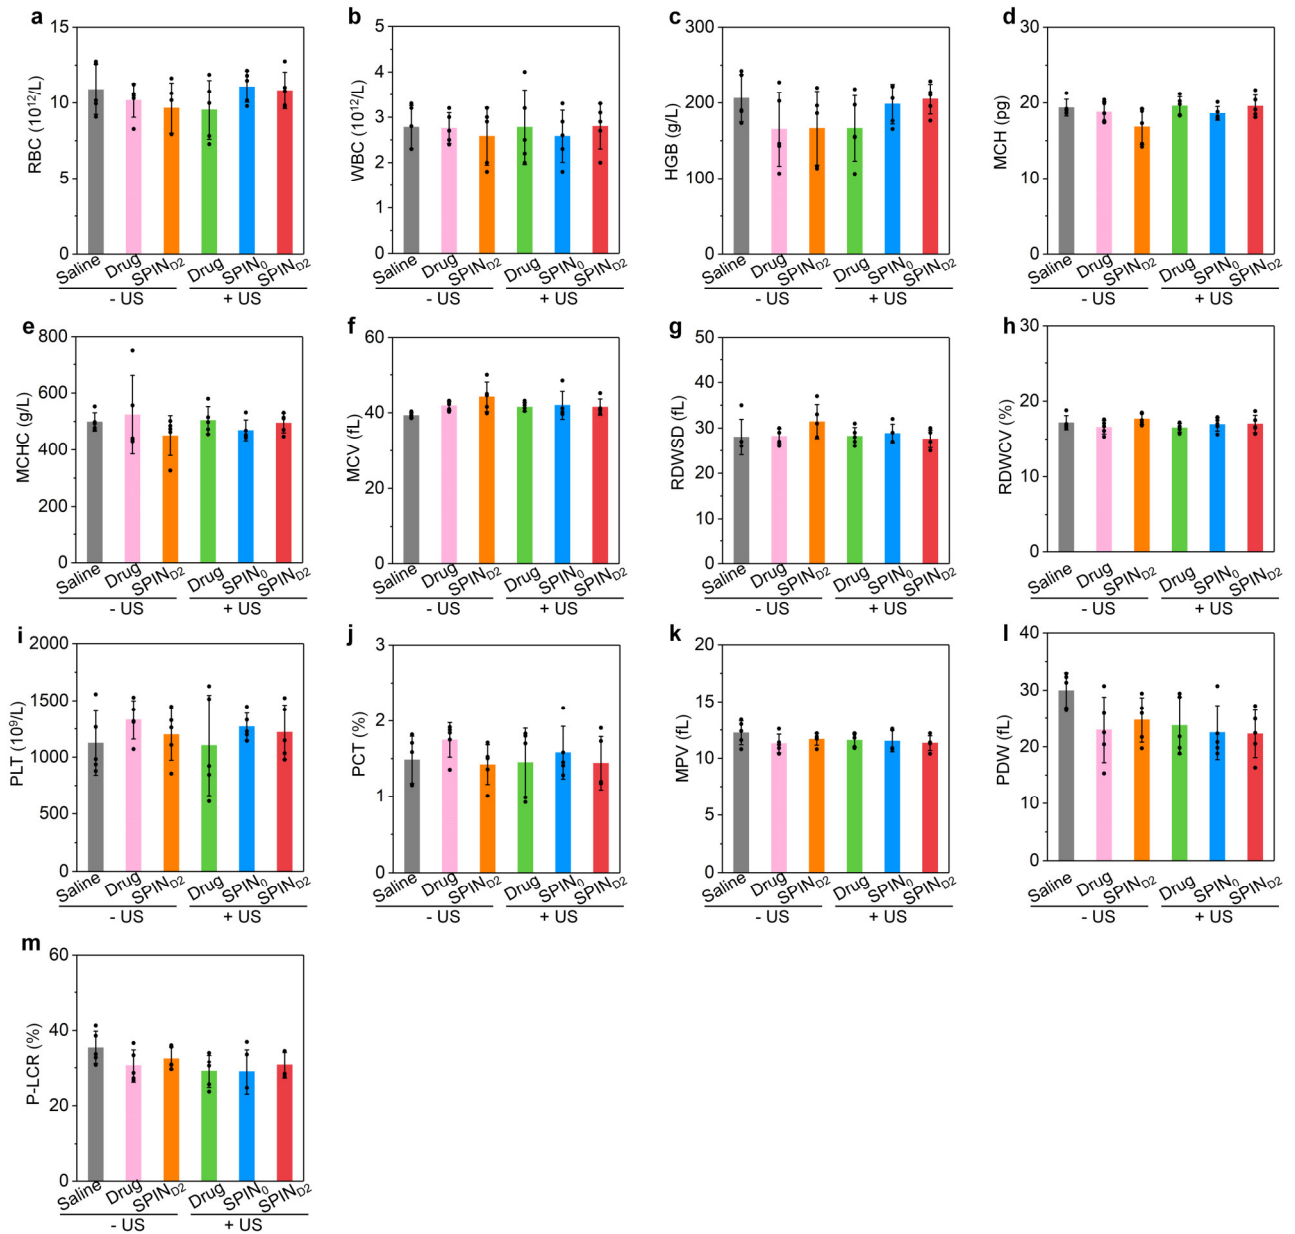

**Supplementary Figure 58. Blood routine analysis.** Blood routine analysis of RBC (a), WBC (b), HGB (c), MCH (d), MCHC (e), MCV (f), RDWSD (g), RDWCV (h), PLT (i), PCT (j), MPV (k), PDW (l) P-LCR (m) in serum of mice at day 30 after systemic administrations of saline, SPIN<sub>0</sub>, SPIN<sub>D2</sub> (0.2 mL, 1.2 mg/mL) or free drug mixture (8 mg/kg body weight for NLG919 and aPD-L1) with or without US irradiation (1.0 MHz, 1.2 W/cm<sup>2</sup>, 50% duty cycle, 10 min) (n = 5). Data are presented as mean values ± SD. Source data are provided as a Source Data file.

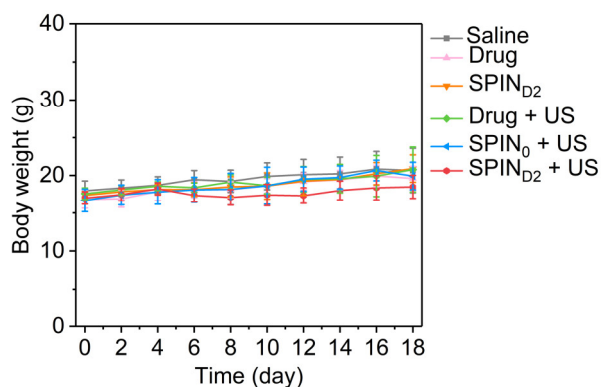

**Supplementary Figure 59. Evaluation of mouse body weight change.** Body weights of mice after systemic administrations of saline, SPIN<sub>0</sub>, SPIN<sub>D2</sub> (0.2 mL, 1.2 mg/mL) or free drug mixture (8 mg/kg body weight for NLG919 and aPD-L1) with or without US irradiation (1.0 MHz, 1.2 W/cm<sup>2</sup>, 50% duty cycle, 10 min) (n = 5). Data are presented as mean values ± SD. Source data are provided as a Source Data file.

**Supplementary Table 1.** Summary of nanomaterials for in vivo sonodynamic therapy of tumors.

| Tumor models and mouse strains                   | Combinational therapy | Material type                                         | US irradiation conditions                             | Reference |
|--------------------------------------------------|-----------------------|-------------------------------------------------------|-------------------------------------------------------|-----------|
| Subcutaneous C32 tumor, Balb/c athymic nude mice | No                    | TiO <sub>2</sub> nanoparticles                        | 1 MHz, 1 W/cm <sup>2</sup> , 50% duty cycle, 2 min    | 1         |
| Subcutaneous SCC7 tumor, C3H/HeN mice.           | No                    | Au-TiO <sub>2</sub> nanocomposites                    | 1.5 MHz, 30 W, 10% duty cycle, 30 s                   | 2         |
| Subcutaneous 4T1 tumor, BALB/c nude mice         | No                    | PpIX and manganese ions loaded silica nanoparticles   | 1 MHz, 2.3 W/cm <sup>2</sup> , 50% duty cycle, 5 min  | 3         |
| Subcutaneous PANC-1 tumor, nude mice             | No                    | IR780/fluorocarbon modified silica nanoparticles      | 1 MHz, 1 W/cm <sup>2</sup> , 100% duty cycle, 3 min   | 4         |
| Subcutaneous U87 tumor, BALB/c nude mice         | No                    | Protoporphyrin/MnO <sub>x</sub> silica nanoparticles  | 1 MHz, 1.5 W/cm <sup>2</sup> , 50% duty cycle, 3 min  | 5         |
| Subcutaneous 4T1 tumor, BALB/c mice              | No                    | Porphyrin contained metal-organic framework           | 1 MHz, 2.5 W/cm <sup>2</sup> , 50% duty cycle, 5 min  | 6         |
| Subcutaneous MCF-7 tumor, nude mice              | No                    | Methylphenylporphyrin based human serum albumin (HSA) | 1 MHz, 2 W/cm <sup>2</sup> , 50% duty cycle, 5 min    | 7         |
| Subcutaneous 4T1 tumor, BALB/c mice              | No                    | Bimetallic oxide MnWO <sub>x</sub> nanoparticles      | 40 kHz, 3 W/cm <sup>2</sup> , 50% duty cycle, 5 min   | 8         |
| Subcutaneous MCF-7 tumor, BALB/c nude mice       | No                    | Au/TiO <sub>2</sub> nanosheets                        | 1 MHz, 1.5 W/cm <sup>2</sup> , 5 min                  | 9         |
| Subcutaneous C6 tumor, BALB/c nude mice          | No                    | PpIX modified MnO <sub>2</sub> nanoparticles          | 1 MHz, 1.5 W/cm <sup>2</sup> , 50% duty cycle, 3 min  | 10        |
| Subcutaneous CT26 tumor, BALB/c nude mice        | No                    | Mn(III)-hemoporphin frameworks                        | 1 MHz, 2.5 W/cm <sup>2</sup> , 50% duty cycle, 10 min | 11        |
| Subcutaneous 4T1 tumor, BALB/c nude mice         | No                    | Carbon dot/MXene heterojunctions                      | 50 kHz, 3 W/cm <sup>2</sup> , 5 min                   | 12        |

|                                                   |                      |                                                                                                                     |                                                                      |    |
|---------------------------------------------------|----------------------|---------------------------------------------------------------------------------------------------------------------|----------------------------------------------------------------------|----|
| Subcutaneous 4T1 tumor, BALB/c nude mice          | No                   | Iridic-porphyrin complex                                                                                            | 3 MHz, 0.3 W/cm <sup>2</sup> , 20 min                                | 13 |
| Subcutaneous LNCaP tumor, BALB/c SCID mice        | No                   | Hematoporphyrin loaded poly(L-glutamic acid-L-tyrosine) nanoparticles                                               | 1 MHz, 3.5 W/cm <sup>2</sup> , 30% duty cycle, 3.5 min               | 14 |
| Subcutaneous U87MG tumor, BALB/c nude mice        | No                   | IR780 and MnO <sub>2</sub> encapsulated PLGA nanoparticles                                                          | 3 W/cm <sup>2</sup> , 50% duty cycle, 5 min                          | 15 |
| Subcutaneous MDA-MB-231 tumor, BALB/c nude mice   | No                   | N-doped graphene quantum dots                                                                                       | 1 MHz, 2.5 W/cm <sup>2</sup> , 50% duty cycle, 5 min                 | 16 |
| Subcutaneous B16 tumor, C57BL/6 mice              | No                   | $\delta$ -Aminolevulinic acid loaded manganese ferrite nanoparticles                                                | 1 MHz, 1.5 W/cm <sup>2</sup> , 50% duty cycle                        | 17 |
| Patient-derived tumor xenograft, BALB/c nude mice | No                   | Patient-derived MVs/AIEgen hybrid system                                                                            | 1 MHz, 0.75 W/cm <sup>2</sup> , 30% duty cycle, 10 min               | 18 |
| Subcutaneous 4T1 tumor, BALB/c mice               | No                   | Hemoglobin-based metalloporphyrin                                                                                   | 1 MHz, 1.5 W/cm <sup>2</sup> , 50% duty cycle, 5 min                 | 19 |
| Subcutaneous 4T1 tumor, BALB/c mice               | No                   | Defect-rich Ti-based metal-organic framework                                                                        | 1 MHz, 1.5 W/cm <sup>2</sup> , 50% duty cycle, 5 min                 | 20 |
| Subcutaneous 4T1 tumor, BALB/c mice               | No                   | Pt-based branched vanadium tetrasulfide nanodendrites                                                               | 1 MHz, 1.5 W/cm <sup>2</sup> , 50% duty cycle, 5 min                 | 21 |
| Subcutaneous BxPC-3 tumor, BALB/c nude mice       | Starvation therapy   | Erythrocyte membrane camouflaged metal-organic framework integrated with platinum nanoparticles and glucose oxidase | 3 MHz, 1.5 W/cm <sup>2</sup> , 10 min                                | 22 |
| Orthotopic BxPC-3 tumor, Balb/c SCID mice         | Chemotherapy         | Rose bengal and 5-fluorouracil functionalized magnetic microbubbles                                                 | 1 MHz, 3.5 W/cm <sup>2</sup> , 30% duty cycle, 3.5 min               | 23 |
| Subcutaneous SMMC-7721 tumor, BALB/c nude mice    | Chemotherapy         | Doxorubicin loaded and PpIX conjugated silica nanoparticles                                                         | 1 MHz, 1.5 W/cm <sup>2</sup> , 50% duty cycle, 5 min                 | 24 |
| Subcutaneous MDA-MB-231 tumor, BALB/c nude mice   | Chemotherapy         | Doxorubicin loaded TiO <sub>2</sub> nanoparticles                                                                   | 1.5 MHz, 15 W/cm <sup>2</sup> , 20% duty cycle, 5 min                | 25 |
| Subcutaneous 4T1 tumor, BALB/c mice               | Chemotherapy         | Doxorubicin loaded Pt/TiO <sub>2</sub> nanoparticles                                                                | 1 MHz, 1.5 W/cm <sup>2</sup> , 50% duty cycle, 5 min                 | 26 |
| Subcutaneous BxPC-3 tumour, SCID mice             | Chemotherapy         | Rose bengal and gemcitabine functionalized magnetic microbubbles                                                    | 1.17 MHz, 30% duty cycle, 3.5 min                                    | 27 |
| Subcutaneous HeLa tumor, Nu/Nu nude mice          | Chemodynamic therapy | H <sub>2</sub> O <sub>2</sub> /Fe <sub>3</sub> O <sub>4</sub> -PLGA polymersomes                                    | 40 MHz, 30 min                                                       | 28 |
| Subcutaneous Saos-2 tumor, BALB/c nude mice       | Chemodynamic therapy | Ferrate(VI) and PpIX loaded silica nanoplatfoms                                                                     | 1 MHz, 1.4 W/cm <sup>2</sup> , 5 min                                 | 29 |
| Orthotopic 97H tumor, BALB/c nude mice            | Chemodynamic therapy | Gold/manganese oxide hybrid nanoparticles                                                                           | 1 MHz, 2 W/cm <sup>2</sup> , 10 min                                  | 30 |
| Subcutaneous 4T1 tumor, BALB/c mice               | Chemodynamic therapy | PtCu <sub>3</sub> nanocages                                                                                         | 35 kHz, 3 W/cm <sup>2</sup> , 1 min per cycle for ten cycles, 10 min | 31 |
| Subcutaneous 4T1 tumor, BALB/c nude mice          | Chemodynamic therapy | TiO <sub>2</sub> -Fe <sub>3</sub> O <sub>4</sub> @PEG Janus nanostructure                                           | 1 MHz, 1.5 W/cm <sup>2</sup> , 50% duty cycle, 5 min                 | 32 |
| Subcutaneous 4T1 and H22 tumors, BALB/c mice      | Ferroptosis          | Manganese porphyrin-based metal-organic framework                                                                   | 1 MHz, 1 W/cm <sup>2</sup> , 50% duty cycle, 5-10 min                | 33 |
| Subcutaneous RIF-1 tumor, C3H/HeN mice            | Photodynamic therapy | Hematoporphyrin and indocyanine green loaded PLGA nanoparticles                                                     | 1 MHz, 3.5 W/cm <sup>2</sup> , 50% duty cycle, 3.5 min               | 34 |
| Subcutaneous 4T1 tumor, BALB/c nude               | Photothermal therapy | Graphene-integrated TiO <sub>2</sub> nanoparticles                                                                  | 1 MHz, 1 W/cm <sup>2</sup> , 50% duty cycle, 5 min                   | 35 |

|                                           |                                             |                                                                                                |                                                          |    |
|-------------------------------------------|---------------------------------------------|------------------------------------------------------------------------------------------------|----------------------------------------------------------|----|
| mice                                      |                                             |                                                                                                |                                                          |    |
| Subcutaneous 4T1 tumor, nude mice         | Photothermal therapy                        | TiO <sub>2-x</sub> layer coated TiO <sub>2</sub> nanocrystals                                  | 1 MHz, 1.5 W/cm <sup>2</sup> , 50% duty cycle, 5 min     | 36 |
| Subcutaneous CT26 tumor, BALB/c nude mice | Photothermal therapy                        | Tetra-(4-aminophenyl) porphyrin loaded Pt-CuS nanoparticles                                    | 1 MHz, 1 W/cm <sup>2</sup> , 60% duty cycle, 5 min       | 37 |
| Subcutaneous 4T1 tumor, BALB/c mice       | Photothermal therapy, chemotherapy          | Polypyrrole coated and honokiol loaded TiO <sub>2</sub> nanoparticles                          | 1 MHz, 1.5 W/cm <sup>2</sup> , 1 min                     | 38 |
| Subcutaneous MDA-MB-231 tumor, nude mice  | Photothermal and photodynamic therapy       | Peptide-ICG nanomicelles                                                                       | 1 MHz, 2.4 W/cm <sup>2</sup> , 50% duty cycle, 5 min     | 39 |
| Subcutaneous 4T1 tumor, BALB/c mice       | Photothermal therapy                        | Polypeptide-capped Te nanorods                                                                 | 1 MHz, 1 W/cm <sup>2</sup> , 2 min                       | 40 |
| Subcutaneous 4T1 tumor, BALB/c mice       | Photothermal therapy                        | Titanium carbide nanosheets                                                                    | 40 kHz, 3 W/cm <sup>2</sup> , 1 min per cycle, 15 cycles | 41 |
| Subcutaneous HeLa tumor, BALB/c nude mice | Photothermal therapy                        | Cancer cell membrane camouflaged iridium complexes functionalized black-titanium nanoparticles | 1 MHz, 1 W/cm <sup>2</sup> , 50% duty cycle, 5 min       | 42 |
| Subcutaneous 4T1 tumor, BALB/c mice       | Photothermal therapy                        | Titanium nitride nanodots                                                                      | 40 kHz, 3.0 W/cm <sup>2</sup> , 50% duty cycle, 10 min   | 43 |
| Orthotopic 4T1 tumor, BALB/c mice         | Immunotherapy (TLR7 agonist and aPD-L1)     | Hematoporphyrin loaded liposomes                                                               | 1 MHz, 1.5 W/cm <sup>2</sup> , 50% duty cycle, 5 min     | 44 |
| Subcutaneous 4T1 tumor, BALB/c mice       | Immunotherapy (NLG919), gas therapy         | Gold-black phosphorus quantum dots-doped mesoporous silica nanoframeworks                      | 1 MHz, 1 W/cm <sup>2</sup> , 3 min                       | 45 |
| Subcutaneous B16F10 tumor, BALB/c mice    | Immunotherapy (aPD-L1)                      | Melanoma cell membrane-coated TiO <sub>2</sub> nanoparticles modified with aPD-L1              | 1 MHz, 3 W/cm <sup>2</sup> , 20% duty cycle, 5 min       | 46 |
| Subcutaneous 4T1 tumor, BALB/c mice       | Immunotherapy (immunogenic cell death)      | Protoporphyrin-modified mesoporous organosilica nanoparticles                                  | 1 MHz, 1 W/cm <sup>2</sup> , 50% duty cycle, 5 min       | 47 |
| Subcutaneous CT26 tumor, BALB/c mice      | Immunotherapy (TLR9 agonist)                | Zn <sup>2+</sup> -tetrakis(4-carboxyphenyl) porphyrin nanosheets                               | 40 kHz, 2 W/cm <sup>2</sup> , 30 min.                    | 48 |
| Subcutaneous hepa1-6 tumor, C57BL/6 mice  | Immunotherapy (CpG and aPD-L1)              | Titanium dioxide-Chlorin e6-CpG nanosonosensitizers                                            | 1 MHz, 2 W/cm <sup>2</sup> , 50% duty cycle, 7 min       | 49 |
| Subcutaneous U14 tumor, BALB/c mice       | Immunotherapy (aPD-L1), gas therapy         | L-arginine (LA)-loaded black mesoporous titania nanosystems                                    | 1 MHz, 1.5 W/cm <sup>2</sup> , 50% duty cycle, 5 min     | 50 |
| Subcutaneous 4T1 tumor, BALB/c mice       | Gas therapy, Immunotherapy (M1 macrophages) | Perfluorodecalin and IR780 encapsulated human serum albumin-based NO donor                     | 1 MHz, 1 W/cm <sup>2</sup> , 5 min                       | 51 |
| Subcutaneous 4T1 tumor, BALB/c mice       | Immunotherapy (M1 macrophages)              | Manganese protoporphyrin liposomes                                                             | 1 MHz, 2 W/cm <sup>2</sup> , 50% duty cycle, 5 min       | 52 |
| Subcutaneous 4T1 tumor, BALB/c mice       | Immunotherapy (aPD-L1)                      | Titanium dioxide@CaP nanoparticles                                                             | 3 MHz, 2.1 W, 20 min                                     | 53 |
| Subcutaneous B16-OVA tumor, C57BL/6 mice  | Immunotherapy (CpG and aPD-L1)              | CpG loaded manganese porphyrin-based metal-organic frameworks                                  | 1 MHz, 1 W/cm <sup>2</sup> , 50% duty cycle, 10 min      | 54 |
| Subcutaneous B16-F10 tumor, C57BL/6 mice  | Immunotherapy (aPD-L1)                      | Chlorin e6@aPD-L1 lipids                                                                       | 2 MHz, 2 W/cm <sup>2</sup> , 20% duty cycle, 10 min      | 55 |
| Subcutaneous 4T1 tumor, BALB/c mice       | Immunotherapy (aPD-L1)                      | CoFe <sub>2</sub> O <sub>4</sub> Nanoflowers                                                   | 1 MHz, 1 W/cm <sup>2</sup> , 20% duty cycle, 5 min       | 56 |

**Supplementary Table 2.** Summary of injection dosage of NLG919 and aPD-L1 for combinational immunotherapy of different tumor models.

| Immunotherapeutic modulator | Dosage (µg/mouse) | Combinational therapy | Tumor models and mouse strains | Injection way | Reference |
|-----------------------------|-------------------|-----------------------|--------------------------------|---------------|-----------|
|-----------------------------|-------------------|-----------------------|--------------------------------|---------------|-----------|

|        |       |                                                                   |                                                         |                             |            |
|--------|-------|-------------------------------------------------------------------|---------------------------------------------------------|-----------------------------|------------|
| NLG919 | 2500  | Chemotherapy (paclitaxel)                                         | Subcutaneous 4T1 tumor, BALB/c mice                     | i.v. injection              | 57         |
| NLG919 | 2100  | Chemotherapy (doxorubicin)                                        | Subcutaneous 4T1 tumor, BALB/c mice                     | i.v. injection              | 58         |
| NLG919 | 2000  | Chemotherapy (paclitaxel)                                         | Subcutaneous B16-F10 tumor, C57BL/6 mice                | intragastric administration | 59         |
| NLG919 | 2500  | Chemotherapy (oxaliplatin)                                        | Subcutaneous 4T1 tumor, BALB/c mice                     | i.v. injection              | 60         |
| NLG919 | 2500  | Chemotherapy (paclitaxel)                                         | Subcutaneous 4T1 tumor, BALB/c mice                     | i.v. injection              | 61         |
| NLG919 | 2000  | Chemotherapy (doxorubicin)                                        | Subcutaneous 4T1 tumor, BALB/c mice                     | Oral administration         | 62         |
| NLG919 | 2100  | Chemotherapy (docetaxel)                                          | Subcutaneous 4T1 tumor, BALB/c mice                     | i.v. injection              | 63         |
| NLG919 | 2400  | Chemotherapy (gemcitabine and paclitaxel)                         | Subcutaneous Panc02 tumor, C57BL/6 mice                 | i.v. injection              | 64         |
| NLG919 | 480   | Chemotherapy (curcumin)                                           | Subcutaneous B16F10 tumor, C57BL/6 mice                 | i.v. injection              | 65         |
| NLG919 | 400   | Chemotherapy (oxaliplatin)                                        | Subcutaneous and orthotopic CT26 tumor, C57BL/6 mice    | i.v. injection              | 66         |
| NLG919 | 2000  | Chemotherapy (doxorubicin)                                        | Subcutaneous 4T1 tumor, BALB/c mice                     | i.v. injection              | 67         |
| NLG919 | 300   | Chemotherapy (chlorambucil)                                       | Subcutaneous 4T1 tumor, BALB/c mice                     | i.v. injection              | 68         |
| NLG919 | 900   | Chemotherapy (paclitaxel)                                         | Subcutaneous B16F10 tumor, C57BL/6 mice                 | i.v. injection              | 69         |
| NLG919 | 1500  | Chemotherapy (doxorubicin)                                        | Subcutaneous CT26 and orthotopic 4T1 tumor, BALB/c mice | i.v. injection              | 70         |
| NLG919 | 636   | Chemotherapy (docetaxel)                                          | Subcutaneous 4T1 tumor, BALB/c mice                     | i.v. injection              | 71         |
| NLG919 | 1400  | Ferroptosis (sorafenib)                                           | Subcutaneous 4T1 tumor, BALB/c mice                     | i.v. injection              | 72         |
| NLG919 | 120   | Photothermal therapy                                              | Subcutaneous 4T1 tumor, BALB/c mice                     | i.v. injection              | 73         |
| NLG919 | 400   | Photothermal therapy, chemotherapy (gemcitabine)                  | Subcutaneous Panc02, C57BL/6 mice                       | i.v. injection              | 74         |
| NLG919 | 102   | Photodynamic therapy                                              | Subcutaneous 4T1 tumor, BALB/c mice                     | i.v. injection              | 75         |
| NLG919 | 137.6 | Photodynamic therapy                                              | Subcutaneous 4T1 tumor, BALB/c mice                     | intratumoral injection      | 76         |
| NLG919 | 600   | Photodynamic therapy                                              | Subcutaneous 4T1/CT26 tumor, BALB/c mice                | i.v. injection              | 77         |
| NLG919 | 156   | Photodynamic therapy                                              | Subcutaneous CT26 tumor, BALB/c mice                    | i.v. injection              | 78         |
| NLG919 | 600   | Photodynamic therapy                                              | Subcutaneous CT26 tumor, BALB/c mice                    | i.v. injection              | 79         |
| NLG919 | 390   | Photodynamic therapy                                              | Subcutaneous CT26 tumor, BALB/c mice                    | i.v. injection              | 80         |
| NLG919 | 150   | Photodynamic therapy                                              | Subcutaneous B16-F10 tumor, C57BL/6 mice                | i.t. injection              | 81         |
| NLG919 | 120   | Photodynamic therapy, chemotherapy (oxaliplatin)                  | Subcutaneous 4T1 tumor, BALB/c mice                     | i.v. injection              | 82         |
| NLG919 | 120   | Immunotherapy (PD-L1 antagonist)                                  | Subcutaneous B16-F10 tumor, C57BL/6 mice                | i.v. injection              | 83         |
| NLG919 | 1000  | Immunotherapy (aPD-L1)                                            | Subcutaneous Panc02 tumor, C57BL/6 mice                 | i.v. injection              | 84         |
| NLG919 | 2800  | Chemotherapy (combretastatin A4), immunotherapy (PI3Ky inhibitor) | Subcutaneous 4T1 tumor, BALB/c mice                     | i.p. injection              | 85         |
| NLG919 | 150   | Sonodynamic therapy,                                              | Subcutaneous Panc02                                     | i.v. injection              | This study |

|        |      |                                                                       |                                                            |                |            |
|--------|------|-----------------------------------------------------------------------|------------------------------------------------------------|----------------|------------|
|        |      | immunotherapy (aPD-L1)                                                | tumor, C57BL/6 mice                                        |                |            |
| aPD-L1 | 300  | Chemotherapy (doxorubicin)                                            | Orthotopic C6 glioma, BALB/c mice                          | i.p. injection | 86         |
| aPD-L1 | 250  | Chemotherapy (dimer-7-ethyl-10-hydroxycamptothecin, dimer-lonidamine) | Subcutaneous 4T1 tumor, BALB/c mice                        | i.p. injection | 87         |
| aPD-L1 | 500  | Chemotherapy (doxorubicin)                                            | Orthotopic 4T1 tumor, BALB/c mice                          | i.v. injection | 88         |
| aPD-L1 | 225  | Photodynamic therapy                                                  | Subcutaneous 4T1 tumor, BALB/c mice                        | i.p. injection | 89         |
| aPD-L1 | 375  | Photodynamic therapy                                                  | Subcutaneous CT26 tumor, BALB/c mice                       | i.p. injection | 90         |
| aPD-L1 | 300  | Photodynamic therapy                                                  | Subcutaneous 4T1 tumor, BALB/c mice                        | i.p. injection | 91         |
| aPD-L1 | 150  | Photothermal therapy                                                  | Subcutaneous 4T1 tumor, BALB/c mice                        | i.p. injection | 92         |
| aPD-L1 | 250  | Photothermal therapy, chemotherapy (doxorubicin)                      | Subcutaneous CT26 tumor, BALB/c mice                       | i.v. injection | 93         |
| aPD-L1 | 120  | Photothermal therapy, chemotherapy (doxorubicin)                      | Subcutaneous 4T1 tumor, BALB/c mice                        | i.v. injection | 94         |
| aPD-L1 | 150  | Photodynamic therapy, chemotherapy (oxaliplatin)                      | Subcutaneous CT26 tumor, BALB/c mice                       | i.p. injection | 95         |
| aPD-L1 | 300  | Photodynamic therapy, ferroptosis (RSL-3)                             | Subcutaneous B16-F10 tumor, C57BL/6 mice                   | i.v. injection | 96         |
| aPD-L1 | 135  | Ferroptosis                                                           | Subcutaneous MC38 tumor, C57BL/6 mice                      | i.v. injection | 97         |
| aPD-L1 | 600  | Pyroptosis                                                            | Subcutaneous B16-F10 tumor, C57BL/6 mice                   | i.v. injection | 98         |
| aPD-L1 | 225  | Photodynamic therapy, immunotherapy (CpG Oligodeoxynucleotides)       | Subcutaneous TUBO tumor, BALB/c mice                       | i.p. injection | 99         |
| aPD-L1 | 225  | Photothermal therapy, immunotherapy (R837)                            | Orthotopic 4T1 tumor, BALB/c mice                          | i.v. injection | 100        |
| aPD-L1 | 400  | Photodynamic therapy, chemotherapy (doxorubicin)                      | Subcutaneous CT26 tumor, BALB/c mice                       | i.v. injection | 101        |
| aPD-L1 | 300  | Photodynamic therapy, chemotherapy (oxaliplatin)                      | Subcutaneous 4T1 tumor, BALB/c mice                        | i.p. injection | 44         |
| aPD-L1 | 375  | Magnetic hyperthermia therapy                                         | Orthotopic 4T1 tumor, BALB/c mice                          | i.p. injection | 102        |
| aPD-L1 | 300  | Radiotherapy                                                          | Subcutaneous CT26 tumor, BALB/c mice                       | i.p. injection | 103        |
| aPD-L1 | 225  | Radiotherapy, photothermal therapy                                    | Subcutaneous 4T1 tumor, BALB/c mice                        | i.t. injection | 104        |
| aPD-L1 | 1200 | Immunotherapy (aCD3, aCD28)                                           | Orthotopic 4T1 tumor, Subcutaneous CT26 tumor, BALB/c mice | i.v. injection | 105        |
| aPD-L1 | 180  | Sonodynamic therapy, immunotherapy (NLG919)                           | Subcutaneous Panc02 tumor, C57BL/6 mice                    | i.v. injection | This study |

### Supplementary Reference:

1. Harada, Y. et al. Ultrasound activation of TiO<sub>2</sub> in melanoma tumors. *J. Controlled Release* **149**, 190-195 (2011).
2. Deepagan, V. et al. Long-circulating Au-TiO<sub>2</sub> nanocomposite as a sonosensitizer for ROS-mediated eradication of cancer. *Nano Lett.* **16**, 6257-6264 (2016).
3. Huang, P. et al. Metalloporphyrin-encapsulated biodegradable nanosystems for highly efficient magnetic resonance imaging-guided sonodynamic cancer therapy. *J. Am. Chem. Soc.* **139**, 1275-1284 (2017).
4. Chen, J. et al. Oxygen-self-produced nanoplatfor for relieving hypoxia and breaking resistance to sonodynamic treatment of pancreatic cancer. *ACS Nano* **11**, 12849-12862 (2017).



5. Zhu, P., Chen, Y. & Shi, J. Nanoenzyme-augmented cancer sonodynamic therapy by catalytic tumor oxygenation. *ACS Nano* **12**, 3780-3795 (2018).
6. Pan, X. et al. Metal-organic-framework-derived carbon nanostructure augmented sonodynamic cancer therapy. *Adv. Mater.* **30**, 1800180 (2018).
7. Ma, A. et al. Metalloporphyrin complex-based nanosonosensitizers for deep-tissue tumor theranostics by noninvasive sonodynamic therapy. *Small* **15**, 1804028 (2019).
8. Gong, F. et al. Ultrasmall oxygen-deficient bimetallic oxide MnWO<sub>x</sub> nanoparticles for depletion of endogenous GSH and enhanced sonodynamic cancer therapy. *Adv. Mater.* **31**, 1900730 (2019).
9. Cao, Y., Wu, T., Dai, W., Dong, H. & Zhang, X. TiO<sub>2</sub> nanosheets with the Au nanocrystal-decorated edge for mitochondria-targeting enhanced sonodynamic therapy. *Chem. Mater.* **31**, 9105-9114 (2019).
10. Liang, K. et al. Intelligent nanocomposites with intrinsic blood-brain-barrier crossing ability designed for highly specific MR imaging and sonodynamic therapy of glioblastoma. *Small* **16**, 1906985 (2020).
11. Geng, P. et al. One responsive stone, three birds: Mn(III)-hemoporphin frameworks with glutathione-enhanced degradation, MRI, and sonodynamic therapy. *Adv. Healthcare Mater.* **10**, 2001463 (2021).
12. Geng, B. et al. Multifunctional carbon dot/MXene heterojunctions for alleviation of tumor hypoxia and enhanced sonodynamic therapy. *Carbon* **179**, 493-504 (2021).
13. Xie, J. et al. Water-soluble iridic-porphyrin complex for non-invasive sonodynamic and sono-oxidation therapy of deep tumors. *ACS Appl. Mater. Interfaces* **13**, 27934-27944 (2021).
14. Hadi, M.M. et al. Investigating the performance of a novel pH and cathepsin B sensitive, stimulus-responsive nanoparticle for optimised sonodynamic therapy in prostate cancer. *J. Controlled Release* **329**, 76-86 (2021).
15. Liu, S. et al. Multifunctional nanozyme for multimodal imaging-guided enhanced sonodynamic therapy by regulating the tumor microenvironment. *Nanoscale* **13**, 14049-14066 (2021).
16. Yang, S. et al. Graphene quantum dots with pyrrole N and pyridine N: superior reactive oxygen species generation efficiency for metal-free sonodynamic tumor therapy. *Small* **17**, 2004867 (2021).
17. Yang, K. et al. A hypoxia responsive nanoassembly for tumor specific oxygenation and enhanced sonodynamic therapy. *Biomaterials* **275**, 120822 (2021).
18. Duo, Y. et al. Patient-derived microvesicles/AIE luminogen hybrid system for personalized sonodynamic cancer therapy in patient-derived xenograft models. *Biomaterials* **272**, 120755 (2021).
19. Yuan, M. et al. A robust oxygen-carrying hemoglobin-based natural sonosensitizer for sonodynamic cancer therapy. *Nano Lett.* **21**, 6042-6050 (2021).
20. Liang, S. et al. Conferring Ti-based MOFs with defects for enhanced sonodynamic cancer therapy. *Adv. Mater.* **33**, 2100333 (2021).
21. Liang, S. et al. A robust narrow bandgap vanadium tetrasulfide sonosensitizer optimized by charge separation engineering for enhanced sonodynamic cancer therapy. *Adv. Mater.* **33**, 2101467 (2021).
22. Bao, Y. et al. Erythrocyte membrane-camouflaged PCN-224 nanocarriers integrated with platinum nanoparticles and glucose oxidase for enhanced tumor sonodynamic therapy and synergistic starvation therapy. *ACS Appl. Mater. Interfaces* **13**, 24532-24542 (2021).
23. Sheng, Y. et al. Magnetically responsive microbubbles as delivery vehicles for targeted sonodynamic and antimetabolite therapy of pancreatic cancer. *J. Controlled Release* **262**, 192-200 (2017).

24. Li, Z. et al. Synergistic sonodynamic/chemotherapeutic suppression of hepatocellular carcinoma by targeted biodegradable mesoporous nanosonosensitizers. *Adv. Funct. Mater.* **28**, 1800145 (2018).
25. Kim, S. et al. Drug-loaded titanium dioxide nanoparticle coated with tumor targeting polymer as a sonodynamic chemotherapeutic agent for anti-cancer therapy. *Nanomedicine* **24**, 102110 (2020).
26. Liang, S. et al. A novel Pt-TiO<sub>2</sub> heterostructure with oxygen-deficient layer as bilaterally enhanced sonosensitizer for synergistic chemo-sonodynamic cancer therapy. *Adv. Funct. Mater.* **30**, 1908598 (2020).
27. Beguin, E. et al. Magnetic microbubble mediated chemo-sonodynamic therapy using a combined magnetic-acoustic device. *J. Controlled Release* **317**, 23-33 (2020).
28. Li, W.-P., Su, C.-H., Chang, Y.-C., Lin, Y.-J. & Yeh, C.-S. Ultrasound-induced reactive oxygen species mediated therapy and imaging using a fenton reaction activable polymersome. *ACS Nano* **10**, 2017-2027 (2016).
29. Fu, J., Li, T., Zhu, Y. & Hao, Y. Ultrasound - activated oxygen and ROS generation nanosystem systematically modulates tumor microenvironment and sensitizes sonodynamic therapy for hypoxic solid tumors. *Adv. Funct. Mater.* **29**, 1906195 (2019).
30. Lin, X. et al. An ultrasound activated vesicle of janus Au-MnO nanoparticles for promoted tumor penetration and sono-chemodynamic therapy of orthotopic liver cancer. *Angew. Chem. Int. Ed.* **59**, 1682-1688 (2020).
31. Zhong, X. et al. GSH-depleted PtCu<sub>3</sub> nanocages for chemodynamic-enhanced sonodynamic cancer therapy. *Adv. Funct. Mater.* **30**, 1907954 (2020).
32. Xu, W. et al. Engineering Janus Chemoreactive Nanosonosensitizers for Bilaterally Augmented Sonodynamic and Chemodynamic Cancer Nanotherapy. *Adv. Funct. Mater.* **31**, 2103134 (2021).
33. Xu, Q. et al. Manganese porphyrin-based metal-organic framework for synergistic sonodynamic therapy and ferroptosis in hypoxic tumors. *Theranostics* **11**, 1937 (2021).
34. Nomikou, N. et al. A versatile, stimulus-responsive nanoparticle-based platform for use in both sonodynamic and photodynamic cancer therapy. *Acta Biomater.* **49**, 414-421 (2017).
35. Dai, C., Zhang, S., Liu, Z., Wu, R. & Chen, Y. Two-dimensional graphene augments nanosonosensitized sonocatalytic tumor eradication. *ACS Nano* **11**, 9467-9480 (2017).
36. Han, X. et al. Oxygen-deficient black titania for synergistic/enhanced sonodynamic and photoinduced cancer therapy at near infrared-II biowindow. *ACS Nano* **12**, 4545-4555 (2018).
37. Liang, S. et al. Intelligent hollow Pt-CuS janus architecture for synergistic catalysis-enhanced sonodynamic and photothermal cancer therapy. *Nano Lett.* **19**, 4134-4145 (2019).
38. He, Y. et al. Multifunctional polypyrrole-coated mesoporous TiO<sub>2</sub> nanocomposites for photothermal, sonodynamic, and chemotherapeutic treatments and dual-modal ultrasound/photoacoustic imaging of tumors. *Adv. Healthcare Mater.* **8**, 1801254 (2019).
39. Liu, Z., Li, J., Chen, W., Liu, L. & Yu, F. Light and sound to trigger the Pandora's box against breast cancer: A combination strategy of sonodynamic, photodynamic and photothermal therapies. *Biomaterials* **232**, 119685 (2020).
40. Li, C.-Q. et al. In situ synthesis of multifunctional tellurium nanorods stabilized by polypeptide-engineered for photothermal-sonodynamic combination therapy of tumors. *Chem. Eng. J.* **417**, 127989 (2021).
41. Li, G. et al. Titanium carbide nanosheets with defect structure for photothermal-enhanced sonodynamic therapy. *Bioact. Mater.* **8**, 409-419 (2022).
42. Shen, J. et al. Cancer cell membrane camouflaged iridium complexes functionalized black-titanium nanoparticles for hierarchical-targeted synergistic NIR-II photothermal and sonodynamic therapy. *Biomaterials* **275**, 120979 (2021).

43. Wang, X. et al. Liquid exfoliation of TiN nanodots as novel sonosensitizers for photothermal-enhanced sonodynamic therapy against cancer. *Nano Today* **39**, 101170 (2021).
44. Yue, W. et al. Checkpoint blockade and nanosonosensitizer-augmented noninvasive sonodynamic therapy combination reduces tumour growth and metastases in mice. *Nat. Commun.* **10**, 2025 (2019).
45. Zhang, D. et al. Ultrasound-driven biomimetic nanosystem suppresses tumor growth and metastasis through sonodynamic therapy, CO therapy, and indoleamine 2, 3-dioxygenase inhibition. *ACS Nano* **14**, 8985-8999 (2020).
46. Wei, X. et al. Homology and immune checkpoint dual-targeted sonocatalytic nanoagents for enhancing sonodynamic tumor therapy. *ACS Appl. Mater. Interfaces* **13**, 32810-32822 (2021).
47. Yin, Y. et al. Continuous inertial cavitation evokes massive ROS for reinforcing sonodynamic therapy and immunogenic cell death against breast carcinoma. *Nano Today* **36**, 101009 (2021).
48. Zhu, W. et al. Sonodynamic therapy with immune modulatable two-dimensional coordination nanosheets for enhanced anti-tumor immunotherapy. *Nano Res.* **14**, 212-221 (2021).
49. Lin, X. et al. Nanosonosensitizer-augmented sonodynamic therapy combined with checkpoint blockade for cancer immunotherapy. *Int. J. Nanomed.* **16**, 1889-1899 (2021).
50. Wang, M. et al. A multifunctional nanovaccine based on L-arginine-loaded black mesoporous titania: ultrasound-triggered synergistic cancer sonodynamic therapy/gas therapy/immunotherapy with remarkably enhanced efficacy. *Small* **17**, 2005728 (2021).
51. Ji, C. et al. Mitochondria-targeted and ultrasound-responsive nanoparticles for oxygen and nitric oxide codelivery to reverse immunosuppression and enhance sonodynamic therapy for immune activation. *Theranostics* **11**, 8587-8604 (2021).
52. Chen, H. et al. Noninvasively immunogenic sonodynamic therapy with manganese protoporphyrin liposomes against triple-negative breast cancer. *Biomaterials* **269**, 120639 (2021).
53. Tan, X. et al. Transformable nanosensitizer with tumor microenvironment - activated sonodynamic process and calcium release for enhanced cancer immunotherapy. *Angew. Chem. Int. Ed.* **60**, 14051-14059 (2021).
54. Zhan, G. et al. Biomimetic sonodynamic therapy-nanovaccine integration platform potentiates Anti-PD-1 therapy in hypoxic tumors. *Nano Today* **38**, 101195 (2021).
55. Huang, J. et al. Nanodrug with dual-sensitivity to tumor microenvironment for immuno-sonodynamic anti-cancer therapy. *Biomaterials* **269**, 120636 (2021).
56. Fu, S. et al. Catalytically active CoFe<sub>2</sub>O<sub>4</sub> nanoflowers for augmented sonodynamic and chemodynamic combination therapy with elicitation of robust immune response. *ACS Nano* **15**, 11953-11969 (2021).
57. Chen, Y. et al. An immunostimulatory dual-functional nanocarrier that improves cancer immunochemotherapy. *Nat. Commun.* **7**, 13443 (2016).
58. Sun, J.-j. et al. Programmable co-delivery of the immune checkpoint inhibitor NLG919 and chemotherapeutic doxorubicin via a redox-responsive immunostimulatory polymeric prodrug carrier. *Acta Pharmacol. Sin.* **38**, 823-834 (2017).
59. Meng, X. et al. Combinatorial antitumor effects of indoleamine 2,3-dioxygenase inhibitor NLG919 and paclitaxel in a murine B16-F10 melanoma model. *Int. J. Immunopathol. Pharmacol.* **30**, 215-226 (2017).
60. Feng, B. et al. Binary cooperative prodrug nanoparticles improve immunotherapy by synergistically modulating immune tumor microenvironment. *Adv. Mater.* **30**, 1803001 (2018).
61. Xu, J. et al. NLG919/cyclodextrin complexation and anti-cancer therapeutic benefit as a potential immunotherapy in combination with paclitaxel. *Eur. J. Pharm. Sci.* **138**, 105034 (2019).

62. Gao, J., Deng, F. & Jia, W. Inhibition of indoleamine 2,3-dioxygenase enhances the therapeutic efficacy of immunogenic chemotherapeutics in breast cancer. *J. Breast. Cancer* **22**, 196-209 (2019).
63. Qiao, H. et al. Folate pH-degradable nanogels for the simultaneous delivery of docetaxel and an IDO1-inhibitor in enhancing cancer chemo-immunotherapy. *Biomater. Sci.* **7**, 2749-2758 (2019).
64. Sun, J. et al. Triple drugs co-delivered by a small gemcitabine-based carrier for pancreatic cancer immunochemotherapy. *Acta Biomater.* **106**, 289-300 (2020).
65. Dai, L. et al. Programmable prodrug micelle with size-shrinkage and charge-reversal for chemotherapy-improved IDO immunotherapy. *Biomaterials* **241**, 119901 (2020).
66. Shen, F. et al. Oxaliplatin-/NLG919 prodrugs-constructed liposomes for effective chemo-immunotherapy of colorectal cancer. *Biomaterials* **255**, 120190 (2020).
67. Zhao, L. et al. Self-delivery oxidative stress amplifier for chemotherapy sensitized immunotherapy. *Biomaterials* **275**, 120970 (2021).
68. Ding, Y. et al. Plasmon-driven catalytic chemotherapy augments cancer immunotherapy through induction of immunogenic cell death and blockage of IDO pathway. *Adv. Mater.* **33**, 2102188 (2021).
69. Luo, K. et al. Charge convertible biomimetic micellar nanoparticles for enhanced melanoma-targeted therapy through tumor cells and tumor-associated macrophages dual chemotherapy with IDO immunotherapy. *Chem. Eng. J.* **412**, 128659 (2021).
70. Zhu, Y. et al. CaCO<sub>3</sub>-assisted preparation of pH-responsive immune-modulating nanoparticles for augmented chemo-immunotherapy. *Nano-Micro Lett.* **13**, 29 (2021).
71. Lang, T. et al. Ternary regulation of tumor microenvironment by heparanase-sensitive micelle-loaded monocytes improves chemo-immunotherapy of metastatic breast cancer. *Adv. Funct. Mater.* **31**, 2007402 (2021).
72. Zuo, T. et al. pH-sensitive molecular-switch-containing polymer nanoparticle for breast cancer therapy with ferritinophagy-cascade ferroptosis and tumor immune activation. *Adv. Healthcare Mater.* **10**, 2100683 (2021).
73. Peng, J. et al. Photosensitizer micelles together with IDO inhibitor enhance cancer photothermal therapy and immunotherapy. *Adv. Sci.* **5**, 1700891 (2018).
74. Sun, J. et al. Tumor size-dependent abscopal effect of polydopamine-coated all-in-one nanoparticles for immunochemo-photothermal therapy of early-and late-stage metastatic cancer. *Biomaterials* **269**, 120629 (2021).
75. Huang, Z. et al. Enhanced cancer therapy through synergetic photodynamic/immune checkpoint blockade mediated by a liposomal conjugate comprised of porphyrin and IDO inhibitor. *Theranostics* **9**, 5542-5557 (2019).
76. Xing, L. et al. Hypoxia alleviation-triggered enhanced photodynamic therapy in combination with IDO inhibitor for preferable cancer therapy. *Biomaterials* **206**, 170-182 (2019).
77. Gao, A. et al. Sheddable prodrug vesicles combating adaptive immune resistance for improved photodynamic immunotherapy of cancer. *Nano Lett.* **20**, 353-362 (2019).
78. Hu, X. et al. Supramolecular prodrug nanovectors for active tumor targeting and combination immunotherapy of colorectal cancer. *Adv. Sci.* **7**, 1903332 (2020).
79. Hou, B. et al. Engineering stimuli-activatable boolean logic prodrug nanoparticles for combination cancer immunotherapy. *Adv. Mater.* **32**, 1907210 (2020).
80. Zhao, L.-P. et al. Self-delivery photo-immune stimulators for photodynamic sensitized tumor immunotherapy. *ACS Nano* **14**, 17100-17113 (2020).
81. Yang, X. et al. Nanoconjugates to enhance PDT-mediated cancer immunotherapy by targeting

- the indoleamine-2, 3-dioxygenase pathway. *J. Nanobiotechnol.* **19**, 182 (2021).
82. Feng, B. et al. Self-amplified drug delivery with light-inducible nanocargoes to enhance cancer immunotherapy. *Adv. Mater.* **31**, 1902960 (2019).
  83. Cheng, K. et al. Sequentially responsive therapeutic peptide assembling nanoparticles for dual-targeted cancer immunotherapy. *Nano Lett.* **18**, 3250-3258 (2018).
  84. Han, X. et al. Modularly designed peptide nanoprodrug augments antitumor immunity of PD-L1 checkpoint blockade by targeting indoleamine 2,3-dioxygenase. *J. Am. Chem. Soc.* **142**, 2490-2496 (2020).
  85. Qin, H. et al. PI3Kgamma inhibitor attenuates immunosuppressive effect of poly (l-glutamic acid)-combretastatin A4 conjugate in metastatic breast cancer. *Adv. Sci.* **6**, 1900327 (2019).
  86. Ruan, S. et al. Aggregable nanoparticles-enabled chemotherapy and autophagy inhibition combined with anti-PD-L1 antibody for improved glioma treatment. *Nano Lett.* **19**, 8318-8332 (2019).
  87. Yang, X. et al. Tumor microenvironment-responsive dual drug dimer-loaded pegylated bilirubin nanoparticles for improved drug delivery and enhanced immune-chemotherapy of breast cancer. *Adv. Funct. Mater.* **29**, 1901896 (2019).
  88. Shao, D. et al. Biomimetic diselenide-bridged mesoporous organosilica nanoparticles as an X-ray-responsive biodegradable carrier for chemo-immunotherapy. *Adv. Mater.* **32**, 2004385 (2020).
  89. Duan, X. et al. Photodynamic therapy mediated by nontoxic core-shell nanoparticles synergizes with immune checkpoint blockade to elicit antitumor immunity and antimetastatic effect on breast cancer. *J. Am. Chem. Soc.* **138**, 16686-16695 (2016).
  90. Lan, G. et al. Nanoscale metal-organic framework overcomes hypoxia for photodynamic therapy primed cancer immunotherapy. *J. Am. Chem. Soc.* **140**, 5670-5673 (2018).
  91. Wang, R. et al. Sustained antitumor immunity based on persistent luminescence nanoparticles for cancer immunotherapy. *Adv. Funct. Mater.* **31**, 2106884 (2021).
  92. Wang, R. et al. Surface-functionalized modified copper sulfide nanoparticles enhance checkpoint blockade tumor immunotherapy by photothermal therapy and antigen capturing. *ACS Appl. Mater. Interfaces* **11**, 13964-13972 (2019).
  93. Wen, Y. et al. Photothermal-chemotherapy integrated nanoparticles with tumor microenvironment response enhanced the induction of immunogenic cell death for colorectal cancer efficient treatment. *ACS Appl. Mater. Interfaces* **11**, 43393-43408 (2019).
  94. Hu, L. et al. The potentiated checkpoint blockade immunotherapy by ROS-responsive nanocarrier-mediated cascade chemo-photodynamic therapy. *Biomaterials* **223**, 119469 (2019).
  95. He, C. et al. Core-shell nanoscale coordination polymers combine chemotherapy and photodynamic therapy to potentiate checkpoint blockade cancer immunotherapy. *Nat. Commun.* **7**, 12499 (2016).
  96. Song, R. et al. Acidity-activatable dynamic nanoparticles boosting ferroptotic cell death for immunotherapy of cancer. *Adv. Mater.* **33**, 2101155 (2021).
  97. Liang, H. et al. Renal clearable ultrasmall single-crystal Fe nanoparticles for highly selective and effective ferroptosis therapy and immunotherapy. *J. Am. Chem. Soc.* **143**, 15812-15823 (2021).
  98. Xiong, H. et al. Inspired epigenetic modulation synergy with adenosine inhibition elicits pyroptosis and potentiates cancer immunotherapy. *Adv. Funct. Mater.* **31**, 2100007 (2021).
  99. Ni, K. et al. A nanoscale metal-organic framework to mediate photodynamic therapy and deliver CpG oligodeoxynucleotides to enhance antigen presentation and cancer immunotherapy. *Angew. Chem. Int. Ed.* **59**, 1108-1112 (2020).
  100. Ge, R. et al. Photothermal-activatable Fe<sub>3</sub>O<sub>4</sub> superparticle nanodrug carriers with PD-L1

- immune checkpoint blockade for anti-metastatic cancer immunotherapy. *ACS Appl. Mater. Interfaces* **10**, 20342-20355 (2018).
101. Choi, J. et al. Visible-light-triggered prodrug nanoparticles combine chemotherapy and photodynamic therapy to potentiate checkpoint blockade cancer immunotherapy. *ACS Nano* **15**, 12086-12098 (2021).
102. Liu, X. et al. Ferrimagnetic vortex nanoring-mediated mild magnetic hyperthermia imparts potent immunological effect for treating cancer metastasis. *ACS Nano* **13**, 8811-8825 (2019).
103. Ni, K. et al. Nanoscale metal-organic frameworks enhance radiotherapy to potentiate checkpoint blockade immunotherapy. *Nat. Commun.* **9**, 2351 (2018).
104. Dong, X. et al. A heterojunction structured  $WO_{2.9}$ - $WSe_2$  nanoradiosensitizer increases local tumor ablation and checkpoint blockade immunotherapy upon low radiation dose. *ACS Nano* **14**, 5400-5416 (2020).
105. Chiang, C.-S. et al. Combination of fucoidan-based magnetic nanoparticles and immunomodulators enhances tumour-localized immunotherapy. *Nat. Nanotechnol.* **13**, 746-754 (2018).
